# Supplementary material
Source: PubMed Central journal article supplement (PMC3780383)
Supplement: NIHMS468309-supplement-Table_SI.pdf [file NIHMS468309-supplement-Table_SI.pdf]

**Table S1. Identification and relative quantification of proteins from the forward and reverse labeling experiments.**

| Flybase ID <sup>a</sup> | Peptide sequences identified <sup>b</sup> | Obs <sup>c</sup> | Charge state | Score <sup>c</sup> | Expect <sup>c</sup> | Ratio (PD-like/control) <sup>d</sup> | Experiment <sup>e</sup> | Fraction <sup>f</sup> |
|-------------------------|-------------------------------------------|------------------|--------------|--------------------|---------------------|--------------------------------------|-------------------------|-----------------------|
| FBgn0000053             | K.SVAHVTHGLLNDILR.L                       | 562.98           | 3            | 58                 | 6.70E-05            | 1.13                                 | F                       | F5                    |
| FBgn0000055             | K.LDLGTLEAIQWTK.H                         | 786.43           | 2            | 51                 | 0.0008              | 0.60                                 | F                       | F1                    |
| FBgn0000055             | K.TVDVLINGAGILDDHQIER.T                   | 1060.56          | 2            | 122                | 3.60E-11            | 1.07                                 | F                       | F2                    |
| FBgn0000064             | R.LQDIGVENTEDNRR.A                        | 852.43           | 2            | 37                 | 0.0079              | 1.01                                 | F                       | F1                    |
| FBgn0000064             | K.RLQDIGVENTEDNR.R                        | 850.91           | 2            | 41                 | 0.0039              | 1.03                                 | F                       | F1                    |
| FBgn0000064             | R.IVPIVEPEVLPDGDHDLDR.A                   | 1085.56          | 2            | 100                | 6.20E-09            | 1.27                                 | F                       | F2                    |
| FBgn0000084             | K.GFGTDEQEIIDVLVGR.S                      | 895.46           | 2            | 29                 | 0.089               | 1.07                                 | F                       | F1                    |
| FBgn0000100             | K.VVELFDEFPK.C                            | 653.84           | 2            | 51                 | 0.00054             | 1.26                                 | F                       | F1                    |
| FBgn0000116             | R.VPFSHDDR.L                              | 507.73           | 2            | 34                 | 0.0049              | 1.00                                 | F                       | F2                    |
| FBgn0000116             | R.GEHTEAEGGVYDISNK.R                      | 895.4            | 2            | 41                 | 0.0015              | 0.84                                 | F                       | F1                    |
| FBgn0000116             | K.TDKHPASNFGDVSTFGNVDPPTNEYVISTR.V        | 1086.86          | 3            | 43                 | 0.0016              | 0.76                                 | F                       | F1                    |
| FBgn0000116             | R.LVTAVNEIEKR.V                           | 678.38           | 2            | 43                 | 0.0037              | 0.68                                 | F                       | F1                    |
| FBgn0000116             | R.GEHTEAEGGVYDISNK.R                      | 976.47           | 2            | 53                 | 0.00018             | 0.84                                 | F                       | F3                    |
| FBgn0000116             | R.LGFLTFCPTNLGTTIR.A                      | 927              | 2            | 57                 | 0.00013             | 1.34                                 | F                       | F1                    |
| FBgn0000116             | K.TFLVWCNEEDHLR.I                         | 882.42           | 2            | 61                 | 3.00E-05            | 2.70                                 | F                       | F1                    |
| FBgn0000116             | K.HPASNFGDVSTFGNVDPPTNEYVISTR.V           | 1433.68          | 2            | 75                 | 9.10E-07            | 0.81                                 | F                       | F1                    |
| FBgn0000165             | R.VLAAIDQGYVEDSSGNRIPLDEV.R               | 886.79           | 3            | 42                 | 0.0028              | 0.70                                 | F                       | F1                    |
| FBgn0000165             | K.ALELLFQRPLEPAFTTR.D                     | 682.05           | 3            | 44                 | 0.0012              | 0.97                                 | F                       | F1                    |
| FBgn0000261             | K.NFTQVHADFG.R                            | 667.32           | 2            | 51                 | 0.00031             | 1.00                                 | F                       | F2                    |
| FBgn0000261             | R.LVQNIAGHLNANASQFLQER.A                  | 1085.58          | 2            | 61                 | 4.40E-05            | 1.41                                 | F                       | F2                    |
| FBgn0000261             | R.GPILLQDVNFLDEMESHFDR.E                  | 1144.57          | 2            | 110                | 5.00E-10            | 0.87                                 | F                       | F1                    |
| FBgn0000313             | K.LDLSGDRNDPTNLQTLR.N                     | 657.34           | 3            | 33                 | 0.03                | 1.11                                 | F                       | F1                    |
| FBgn0000313             | K.MSHGYSGSALPAEPLR.H                      | 859.43           | 2            | 38                 | 0.0057              | 1.35                                 | F                       | F3                    |
| FBgn0000313             | R.MLDLSNNDLNTVPLMTQALPHLR.R               | 884.47           | 3            | 38                 | 0.011               | 1.85                                 | F                       | F1                    |
| FBgn0000313             | R.IVDFSHNHLR.G                            | 641.84           | 2            | 44                 | 0.0028              | 1.30                                 | F                       | F5                    |
| FBgn0000313             | K.VFMLHMENTGLR.E                          | 745.37           | 2            | 53                 | 0.00032             | 1.19                                 | F                       | F1                    |
| FBgn0000313             | R.LHYFEYGCLDSLPHLR.S                      | 689.01           | 3            | 54                 | 0.00022             | 2.83                                 | F                       | F5                    |
| FBgn0000313             | R.TFFDGNPIHTLR.E                          | 730.37           | 2            | 60                 | 7.00E-05            | 1.35                                 | F                       | F3                    |
| FBgn0000313             | K.RLDFSENGISSIENAFHEIGHSLISLK.M           | 1071.54          | 3            | 62                 | 3.10E-05            | 1.17                                 | F                       | F4                    |
| FBgn0000313             | K.ISGNHLTEIPDDAFTGLER.S                   | 1064.03          | 2            | 69                 | 8.30E-06            | 1.25                                 | F                       | F1                    |
| FBgn0000313             | K.LAVLDLSHNR.D                            | 590.33           | 2            | 77                 | 9.40E-07            | 1.17                                 | F                       | F1                    |
| FBgn0000313             | R.FNHLTSISQHTFFDLEALR.K                   | 1159.58          | 2            | 90                 | 5.60E-08            | 1.06                                 | F                       | F4                    |
| FBgn0000313             | R.LLLTDNILSEIPYDALGPLK.S                  | 1141.65          | 2            | 93                 | 8.40E-09            | 1.15                                 | F                       | F1                    |
| FBgn0000318             | K.DPNTHLIFLPTLLR.W                        | 847.99           | 2            | 33                 | 0.016               | 1.02                                 | F                       | F1                    |
| FBgn0000318             | R.KDPNTHLIFLPTLLR.W                       | 931.54           | 2            | 50                 | 0.00014             | 1.11                                 | F                       | F1                    |
| FBgn0000319             | K.LLLPWLES.R                              | 586.35           | 2            | 43                 | 0.002               | 1.02                                 | F                       | F1                    |
| FBgn0000319             | R.EHLELFWSR.V                             | 629.82           | 2            | 54                 | 0.00028             | 0.70                                 | F                       | F2                    |
| FBgn0000319             | K.AINEALNGLLIDEEDYQGLR.N                  | 1144.58          | 2            | 92                 | 4.00E-08            | 1.09                                 | F                       | F1                    |
| FBgn0000557             | K.CLIDALDAILPPQRPTDKPLR.L                 | 831.47           | 3            | 35                 | 0.0082              | 2.02                                 | F                       | F2                    |

|             |                                       |         |   |    |          |      |   |    |
|-------------|---------------------------------------|---------|---|----|----------|------|---|----|
| FBgn0000557 | R.VETGLLKPGMVVNFAPVNLVTEVK.S          | 894.17  | 3 | 46 | 0.00035  | 0.92 | F | F1 |
| FBgn0000559 | K.DLVFITHPDQR.E                       | 693.37  | 2 | 32 | 0.044    | 1.56 | F | F3 |
| FBgn0000559 | R.NMSVIAHVDHGK.S                      | 696.34  | 2 | 59 | 7.20E-05 | 1.11 | F | F3 |
| FBgn0000579 | K.VNQIGTVTESIAAHLAK.K                 | 975.05  | 2 | 43 | 0.0013   | 0.74 | F | F1 |
| FBgn0000579 | K.MGSEVYHHLK.N                        | 642.81  | 2 | 48 | 0.00048  | 0.77 | F | F2 |
| FBgn0000579 | K.LANLYQEFIK.D                        | 661.86  | 2 | 54 | 0.00023  | 1.14 | F | F1 |
| FBgn0000579 | R.AAVPSGASTGVHEALELR.D                | 903.97  | 2 | 94 | 3.00E-08 | 0.94 | F | F2 |
| FBgn0000639 | R.QVESLIADVLLGR.L                     | 727.92  | 2 | 46 | 0.0011   | 0.33 | F | F1 |
| FBgn0000639 | R.FPQHLLLP.R.G                        | 581.84  | 2 | 47 | 0.00069  | 0.54 | F | F2 |
| FBgn0000639 | R.LSEIVLHNL.R.Q                       | 618.36  | 2 | 57 | 5.30E-05 | 0.45 | F | F3 |
| FBgn0000667 | K.AFEEWLLAETMR.L                      | 770.89  | 2 | 36 | 0.011    | 0.92 | F | F1 |
| FBgn0000667 | K.KKHEAFESDLAAHQDR.V                  | 669.99  | 3 | 37 | 0.0096   | 1.36 | F | F5 |
| FBgn0000667 | R.HRPDLIDYAK.L                        | 656.34  | 2 | 50 | 0.00041  | 1.11 | F | F2 |
| FBgn0000667 | K.ATLGEADKEFNLIVNLVR.E                | 1043.57 | 2 | 62 | 2.60E-05 | 0.80 | F | F1 |
| FBgn0000667 | K.IHQAVQESMIFENR.Y                    | 872.43  | 2 | 62 | 3.60E-05 | 0.97 | F | F1 |
| FBgn0000667 | K.KHEAFESDLAAHQDR.V                   | 919.43  | 2 | 62 | 2.50E-05 | 1.05 | F | F5 |
| FBgn0000667 | R.LASDLLEWIR.R                        | 629.35  | 2 | 63 | 3.80E-05 | 0.91 | F | F1 |
| FBgn0001098 | R.ESNYHLLSVQESLER.R                   | 989.49  | 2 | 53 | 0.00024  | 1.17 | F | F3 |
| FBgn0001098 | K.TFIVQGFNVGLHTTR.Y                   | 894.98  | 2 | 79 | 9.00E-07 | 0.85 | F | F1 |
| FBgn0001114 | R.NVVHFGGNAGQVTLVGGQAGGATLAHALSLSGR.A | 1034.55 | 3 | 99 | 3.30E-09 | 1.40 | F | F4 |
| FBgn0001125 | R.EIYIPSPSWGNIHVAIFEHAGLPVNR.Y        | 949.16  | 3 | 33 | 0.023    | 1.09 | F | F4 |
| FBgn0001128 | R.DLFQANHFR.V                         | 595.29  | 2 | 47 | 0.0011   | 1.52 | F | F3 |
| FBgn0001128 | K.AEGGIDLISHIITR.H                    | 797.44  | 2 | 90 | 5.80E-08 | 1.61 | F | F3 |
| FBgn0001145 | R.RPSSNCDPYSVVEAILR.T                 | 1004.51 | 2 | 37 | 0.013    | 3.09 | F | F3 |
| FBgn0001145 | K.HETSSINDFSAGVANR.G                  | 873.91  | 2 | 92 | 2.00E-08 | 0.97 | F | F3 |
| FBgn0001208 | R.FANQILSYGSELDADHPGFTDPEYR.K         | 962.11  | 3 | 55 | 6.80E-05 | 1.25 | F | F1 |
| FBgn0001208 | K.KHDINLVHIESR.S                      | 775.93  | 2 | 60 | 5.70E-05 | 1.19 | F | F5 |
| FBgn0001218 | R.VEIIANDQGNR.I                       | 635.82  | 2 | 45 | 0.002    | 1.08 | F | F1 |
| FBgn0001218 | K.VTHAVVTVPAYFNDAQR.Q                 | 965.5   | 2 | 52 | 0.00042  | 1.21 | F | F1 |
| FBgn0001218 | K.DVHEIVLVGGSTR.I                     | 713.89  | 2 | 56 | 0.00014  | 1.37 | F | F3 |
| FBgn0001218 | K.VFAPEEISAMVLGK.M                    | 787.91  | 2 | 74 | 2.70E-06 | 1.01 | F | F1 |
| FBgn0001219 | R.LVTHFVQEFK.R                        | 666.36  | 2 | 29 | 0.096    | 0.68 | F | F1 |
| FBgn0001219 | R.ARFEELNADLFR.S                      | 761.89  | 2 | 52 | 0.00035  | 0.89 | F | F2 |
| FBgn0001219 | K.SVIHDIVLVGGSTR.I                    | 747.92  | 2 | 53 | 0.00023  | 1.36 | F | F3 |
| FBgn0001219 | K.WLDANQLADKEEYHR.Q                   | 1050.99 | 2 | 88 | 5.10E-08 | 0.83 | F | F1 |
| FBgn0001233 | K.QLEINPDHPIVETLR.Q                   | 908.49  | 2 | 75 | 2.20E-06 | 1.24 | F | F1 |
| FBgn0001248 | K.EYEAAGIWYEHR.L                      | 783.36  | 2 | 43 | 0.001    | 0.66 | F | F1 |
| FBgn0001248 | R.FKDIFEDLYNK.Q                       | 779.39  | 2 | 64 | 2.30E-05 | 0.58 | F | F1 |
| FBgn0001263 | K.VHQLFHTTYEK.A                       | 743.87  | 2 | 39 | 0.0089   | 0.74 | F | F2 |
| FBgn0001402 | R.GTHFVNPDTIVTVRPVR.T                 | 650.69  | 3 | 29 | 0.048    | 1.03 | F | F5 |
| FBgn0001402 | R.QIVINEAAPQDLLTLLHGVQFR.A            | 858.81  | 3 | 30 | 0.022    | 1.41 | F | F1 |
| FBgn0001402 | R.AEEPLALNEWHTVR.V                    | 855.44  | 2 | 42 | 0.0049   | 0.74 | F | F1 |

|             |                               |         |   |    |          |      |   |    |
|-------------|-------------------------------|---------|---|----|----------|------|---|----|
| FBgn0001624 | R.ALELLEDYHAR.L               | 686.35  | 2 | 55 | 0.00024  | 1.27 | F | F3 |
| FBgn0001624 | K.HGDILHVTNASDDEWWQAR.R       | 764.69  | 3 | 56 | 7.30E-05 | 1.19 | F | F5 |
| FBgn0001942 | K.LFVLDEADEMLSR.G             | 790.39  | 2 | 63 | 2.60E-05 | 0.90 | F | F1 |
| FBgn0001942 | R.ILESGCHVVVGTPGR.V           | 813.43  | 2 | 65 | 2.20E-05 | 2.73 | F | F3 |
| FBgn0002526 | R.TNRPLFLGGHVAFQR.A           | 586.66  | 3 | 33 | 0.03     | 0.59 | F | F5 |
| FBgn0002526 | R.ILNDGEDHVVTVQHTQGELR.L      | 1151.57 | 2 | 62 | 3.30E-05 | 0.96 | F | F4 |
| FBgn0002528 | K.RAEQQLEDIELLER.A            | 958.01  | 2 | 53 | 0.00036  | 1.33 | F | F2 |
| FBgn0002564 | K.FLFEIVHR.I                  | 553.32  | 2 | 52 | 0.00046  | 0.67 | F | F3 |
| FBgn0002564 | K.YDFPLDISEPHNAFPDR.L         | 1037.99 | 2 | 68 | 5.80E-06 | 0.59 | F | F1 |
| FBgn0002565 | K.TIVSHYWHLMETYPEYHKK.D       | 863.42  | 3 | 37 | 0.0091   | 0.43 | F | F4 |
| FBgn0002565 | K.TIVSHYWHLMETYPEYHK.K        | 806.72  | 3 | 39 | 0.0039   | 0.48 | F | F4 |
| FBgn0002565 | K.FDVTINVLGNIIQGNADSVDK.K     | 815.75  | 3 | 47 | 0.0011   | 0.63 | F | F1 |
| FBgn0002565 | K.YDEHGHEIPLEHNYQNFFELEHFK.V  | 1052.81 | 3 | 47 | 0.00035  | 0.67 | F | F5 |
| FBgn0002565 | K.NWETFQHVYWAR.Q              | 890.94  | 2 | 48 | 0.00061  | 0.45 | F | F2 |
| FBgn0002565 | K.VHLEAGVNHK.R                | 650.86  | 2 | 51 | 0.00073  | 0.63 | F | F1 |
| FBgn0002565 | R.TYYGVPQWHR.E                | 674.83  | 2 | 58 | 6.80E-05 | 0.58 | F | F2 |
| FBgn0002565 | K.HDYFDVHNFK.F                | 784.85  | 2 | 69 | 2.00E-06 | 0.50 | F | F3 |
| FBgn0002565 | K.FDVTINVLGNIIQGNADSVDKK.F    | 1308.18 | 2 | 99 | 6.70E-09 | 0.52 | F | F1 |
| FBgn0002579 | K.REELSNILTQLR.K              | 757.42  | 2 | 49 | 0.0007   | 1.05 | F | F2 |
| FBgn0002579 | R.KREELSNILTQLR.K             | 842.48  | 2 | 50 | 0.00045  | 0.99 | F | F3 |
| FBgn0002719 | K.LHFACLHEPIDTLAEAVR.K        | 1051.56 | 2 | 59 | 7.60E-05 | 1.16 | F | F4 |
| FBgn0002741 | K.QPGVVD AHLVMHQLTCNGVLEGIR.I | 896.8   | 3 | 27 | 0.12     | 2.68 | F | F4 |
| FBgn0002741 | K.DIQTALEEEQR.A               | 688.84  | 2 | 29 | 0.047    | 1.21 | F | F1 |
| FBgn0002741 | R.AGVLGQMEEFRDER.L            | 841.41  | 2 | 33 | 0.016    | 1.14 | F | F1 |
| FBgn0002741 | R.ATSVRPQFDGLAFPPR.F          | 600.99  | 3 | 33 | 0.049    | 1.28 | F | F3 |
| FBgn0002741 | R.ELENELDGEQR.R               | 688.83  | 2 | 37 | 0.0045   | 1.46 | F | F1 |
| FBgn0002741 | R.KAQQELEEAEER.A              | 772.37  | 2 | 37 | 0.0078   | 0.73 | F | F1 |
| FBgn0002741 | K.KAEELHAAEVK.V               | 675.85  | 2 | 38 | 0.011    | 1.09 | F | F1 |
| FBgn0002741 | K.GAYEEGQEQLAVR.R             | 810.88  | 2 | 39 | 0.0035   | 1.08 | F | F1 |
| FBgn0002741 | K.LQQFFNHMHFVLEQEEYKR.E       | 855.75  | 3 | 42 | 0.0024   | 0.58 | F | F5 |
| FBgn0002741 | K.ELSFQSEEDRK.N               | 726.34  | 2 | 46 | 0.00072  | 1.00 | F | F1 |
| FBgn0002741 | R.AQLELSQVR.Q                 | 543.3   | 2 | 47 | 0.0018   | 1.10 | F | F1 |
| FBgn0002741 | R.RANALQNELEESR.T             | 786.39  | 2 | 47 | 0.001    | 0.92 | F | F3 |
| FBgn0002741 | R.IQEKEEEFENTR.K              | 821.4   | 2 | 49 | 0.0005   | 0.72 | F | F1 |
| FBgn0002741 | R.NLEHDLNLR.E                 | 640.82  | 2 | 50 | 0.00038  | 1.25 | F | F2 |
| FBgn0002741 | R.ANALQNELEESR.T              | 708.34  | 2 | 56 | 0.00012  | 1.12 | F | F1 |
| FBgn0002741 | K.LESELQTLHSDLDELLNEAK.N      | 1194.12 | 2 | 58 | 8.00E-05 | 1.32 | F | F1 |
| FBgn0002741 | K.LTQEA VADLR.N               | 643.84  | 2 | 58 | 0.00013  | 1.08 | F | F1 |
| FBgn0002741 | K.EKNEYYGQLNDR.A              | 863.41  | 2 | 67 | 8.90E-06 | 1.17 | F | F1 |
| FBgn0002741 | K.VKPLLNVSRI                  | 555.34  | 2 | 70 | 1.70E-06 | 1.09 | F | F1 |
| FBgn0002741 | R.KLESELQTLHSDLDELLNEAK.N     | 1276.16 | 2 | 74 | 2.00E-06 | 1.21 | F | F1 |
| FBgn0002741 | K.LEADINELEIALDHANK.A         | 999.53  | 2 | 79 | 8.90E-07 | 1.08 | F | F1 |

|             |                                |         |   |     |          |      |   |    |
|-------------|--------------------------------|---------|---|-----|----------|------|---|----|
| FBgn0002741 | R.RDLEEANIQHESTLANLR.K         | 1076.05 | 2 | 84  | 2.70E-07 | 1.31 | F | F5 |
| FBgn0002741 | R.DLEEANIQHESTLANLR.K          | 997.99  | 2 | 88  | 1.10E-07 | 1.13 | F | F2 |
| FBgn0002741 | K.AKLEQTLDELEDSL.R.E           | 987     | 2 | 90  | 6.90E-08 | 1.25 | F | F1 |
| FBgn0002741 | K.RLEAEKDELQAALAEAEAALEQEENK.V | 1028.17 | 3 | 90  | 3.90E-08 | 1.45 | F | F1 |
| FBgn0002741 | K.AEDMSNLTYLNDASVLHNL.R.Q      | 1159.55 | 2 | 92  | 2.20E-08 | 0.66 | F | F2 |
| FBgn0002741 | K.KKLEADINELEIALDHANK.A        | 1166.62 | 2 | 106 | 1.20E-09 | 0.81 | F | F1 |
| FBgn0002741 | K.KLEADINELEIALDHANK.A         | 1081.56 | 2 | 126 | 1.40E-11 | 0.98 | F | F1 |
| FBgn0002772 | K.LDEFLPIYSQVK.K               | 768.41  | 2 | 60  | 5.60E-05 | 1.01 | F | F1 |
| FBgn0002772 | K.IKLDEFLPIYSQVK.K             | 914.54  | 2 | 77  | 4.40E-07 | 0.91 | F | F1 |
| FBgn0002787 | K.TFEHVPSEIGAEAEAEVGVHLLR.D    | 908.12  | 3 | 63  | 2.10E-05 | 1.16 | F | F4 |
| FBgn0002787 | K.VIVHPLVLLSVVDHFN.R.M         | 667.06  | 3 | 65  | 3.40E-06 | 0.96 | F | F4 |
| FBgn0002921 | K.QAADMILLDDNFASIVTGVEEGR.L    | 1255.13 | 2 | 32  | 0.031    | 1.30 | F | F1 |
| FBgn0002921 | R.LNIPVSEVNPR.E                | 641.87  | 2 | 35  | 0.02     | 0.99 | F | F1 |
| FBgn0002921 | R.YHTEIVFAR.T                  | 589.3   | 2 | 43  | 0.0031   | 0.85 | F | F2 |
| FBgn0002921 | R.FQTHPENGLSHAK.A              | 775.37  | 2 | 44  | 0.0018   | 1.16 | F | F1 |
| FBgn0002921 | K.YQVSIHETEDTNDPR.Y            | 923.42  | 2 | 58  | 3.20E-05 | 1.08 | F | F3 |
| FBgn0002938 | K.TALDNLTKPDGLFYIIDDASR.S      | 845.78  | 3 | 37  | 0.0091   | 0.87 | F | F1 |
| FBgn0002938 | K.MYPEDLAALENPVDENIIESLR.H     | 1287.14 | 2 | 60  | 5.90E-05 | 1.43 | F | F1 |
| FBgn0002938 | K.MLSQANLGVHFVR.C              | 814.42  | 2 | 64  | 3.10E-05 | 1.02 | F | F2 |
| FBgn0002938 | K.SIFQVLLHYR.A                 | 659.37  | 2 | 66  | 1.40E-05 | 0.32 | F | F2 |
| FBgn0002938 | K.IQHYDEEHQVSIEEYR.T           | 1125.01 | 2 | 100 | 1.50E-09 | 1.38 | F | F5 |
| FBgn0002968 | R.DIPAAA WENNNIFDWR.Q          | 987.47  | 2 | 60  | 4.20E-05 | 1.04 | F | F1 |
| FBgn0003071 | R.FSPLVDLIAETNFDQR.I           | 953.99  | 2 | 84  | 2.90E-07 | 1.06 | F | F1 |
| FBgn0003074 | K.AETHALLPYDQYLHR.F            | 624.66  | 3 | 50  | 0.00047  | 0.86 | F | F4 |
| FBgn0003074 | K.GLHSHFVSNI DGTHLAEVLK.K      | 1129.59 | 2 | 73  | 3.10E-06 | 1.02 | F | F5 |
| FBgn0003075 | K.YFSQALDKPPNPFLAILGGAK.V      | 791.76  | 3 | 46  | 0.0011   | 0.97 | F | F1 |
| FBgn0003075 | K.IQLIENLLDK.V                 | 641.87  | 2 | 47  | 0.00072  | 0.99 | F | F1 |
| FBgn0003075 | K.LGDVYVNDAFGTAHR.A            | 838.91  | 2 | 74  | 2.20E-06 | 0.95 | F | F3 |
| FBgn0003149 | R.ADTAESSLNIR.A                | 666.35  | 2 | 29  | 0.083    | 1.89 | F | F1 |
| FBgn0003149 | K.SRLDETHLYETSQR.D             | 933.49  | 2 | 35  | 0.021    | 0.67 | F | F3 |
| FBgn0003149 | R.RLHELELELR.R                 | 450.59  | 3 | 37  | 0.0075   | 0.92 | F | F5 |
| FBgn0003149 | K.RTVELQYEEAASR.I              | 797.4   | 2 | 41  | 0.0052   | 0.55 | F | F2 |
| FBgn0003149 | R.RLENERDELTAAYK.E             | 896.45  | 2 | 45  | 0.002    | 0.85 | F | F2 |
| FBgn0003149 | R.RLAGLNGELEEV.R.S             | 749.4   | 2 | 46  | 0.0014   | 1.00 | F | F2 |
| FBgn0003149 | R.LHELELELR.R                  | 597.33  | 2 | 54  | 0.00018  | 1.00 | F | F2 |
| FBgn0003149 | K.QSLQLTELQAHYEDVQR.Q          | 1050.52 | 2 | 95  | 1.70E-08 | 1.17 | F | F2 |
| FBgn0003149 | R.SLLESSLHQVEIELDSVR.N         | 1048.56 | 2 | 100 | 5.40E-09 | 1.28 | F | F1 |
| FBgn0003149 | R.LEEAEGGAHQFEANR.K            | 914.91  | 2 | 123 | 8.60E-12 | 1.08 | F | F3 |
| FBgn0003162 | K.TVTSTMLGVFR.D                | 627.33  | 2 | 39  | 0.0071   | 0.99 | F | F2 |
| FBgn0003178 | R.LQFDSVPVPHVR.L               | 668.85  | 2 | 48  | 0.00082  | 0.85 | F | F2 |
| FBgn0003178 | K.IENQQGMHNLDEIIEAGDGIMVAR.G   | 1349.66 | 2 | 54  | 0.00016  | 0.73 | F | F1 |
| FBgn0003217 | K.FQHLLNPR.Q                   | 533.79  | 2 | 46  | 0.00097  | 1.04 | F | F3 |

|             |                                  |         |   |     |          |      |   |    |
|-------------|----------------------------------|---------|---|-----|----------|------|---|----|
| FBgn0003217 | K.LGQIEIESQCDELEHVR.N            | 985.99  | 2 | 65  | 1.50E-05 | 3.89 | F | F3 |
| FBgn0003217 | K.ELGQTALHIAAEQNR.R              | 846.94  | 2 | 73  | 3.10E-06 | 1.07 | F | F3 |
| FBgn0003218 | K.IYHVGNHLPGWIK.S                | 809.43  | 2 | 39  | 0.011    | 0.91 | F | F2 |
| FBgn0003279 | K.APIRPDVVNEVHQLLR.R             | 634.37  | 3 | 38  | 0.0044   | 1.02 | F | F4 |
| FBgn0003279 | R.RGPLVVYDKDEGLR.K               | 853.97  | 2 | 43  | 0.0027   | 1.33 | F | F3 |
| FBgn0003279 | R.FVIWTESAFAR.L                  | 684.86  | 2 | 54  | 0.00021  | 0.88 | F | F1 |
| FBgn0003279 | R.YALVSAIAASGVPALVQSK.G          | 965.05  | 2 | 111 | 2.00E-10 | 1.05 | F | F1 |
| FBgn0003392 | R.KFFLSHPSYR.H                   | 683.35  | 2 | 48  | 0.00088  | 0.72 | F | F2 |
| FBgn0003392 | K.FFLSHPSYR.H                    | 598.3   | 2 | 49  | 0.00061  | 1.03 | F | F2 |
| FBgn0003392 | R.KDIHQALAAER.K                  | 668.36  | 2 | 51  | 0.0004   | 1.05 | F | F1 |
| FBgn0003392 | R.VLNQQLTNHIR.D                  | 689.38  | 2 | 54  | 0.00016  | 0.84 | F | F2 |
| FBgn0003392 | K.AMLQMIQQLQSDFER.T              | 940.46  | 2 | 83  | 3.50E-07 | 0.83 | F | F1 |
| FBgn0003432 | R.QRPVFTQPLQNIDR.I               | 878.98  | 2 | 31  | 0.048    | 1.58 | F | F1 |
| FBgn0003432 | R.SEFVDEVVNIRPR.F                | 802.92  | 2 | 37  | 0.013    | 1.16 | F | F3 |
| FBgn0003432 | R.LFEKPIFTQLLTGPSELWEGTHAHFEAR.V | 1115.59 | 3 | 39  | 0.0048   | 1.24 | F | F4 |
| FBgn0003432 | R.RSEFVDEVVNIRPR.F               | 587.65  | 3 | 40  | 0.0069   | 1.10 | F | F5 |
| FBgn0003432 | R.GLHNIETIEGTNVHLECR.L           | 713.02  | 3 | 43  | 0.0028   | 1.30 | F | F5 |
| FBgn0003432 | R.HWLQAESLHPDSLPR.I              | 610.98  | 3 | 50  | 0.00054  | 1.08 | F | F5 |
| FBgn0003432 | R.IHQLEKPLAPRPTPER.L             | 1048.07 | 2 | 53  | 0.00023  | 1.12 | F | F4 |
| FBgn0003432 | K.LVEGQSAHFEAR.L                 | 694.85  | 2 | 75  | 1.60E-06 | 1.22 | F | F2 |
| FBgn0003432 | K.LHEGQHVLLAQVEPR.A              | 950.51  | 2 | 86  | 1.70E-07 | 0.97 | F | F5 |
| FBgn0003470 | K.ASAFNSWFENAEBDLTDPVR.C         | 1170.52 | 2 | 36  | 0.0042   | 1.14 | F | F1 |
| FBgn0003470 | K.KHDAFETDFTAHK.D                | 836.88  | 2 | 42  | 0.0011   | 1.21 | F | F3 |
| FBgn0003470 | K.IAALQTVADQLIAQNHYASNLVDEK.R    | 937.16  | 3 | 53  | 0.00027  | 0.68 | F | F1 |
| FBgn0003470 | K.RKEELNEAWQR.L                  | 771.89  | 2 | 55  | 0.00019  | 0.88 | F | F3 |
| FBgn0003470 | R.AGTFGAFEQFGNELLQANHYASPEIK.E   | 975.14  | 3 | 55  | 0.00014  | 0.88 | F | F1 |
| FBgn0003470 | R.KQHLLDSLQVQQLFR.D              | 969.05  | 2 | 57  | 5.70E-05 | 0.97 | F | F3 |
| FBgn0003470 | R.LNEALTLHQFFR.D                 | 765.91  | 2 | 60  | 7.00E-05 | 0.94 | F | F1 |
| FBgn0003470 | K.DKETFVTADEFGQDLEHVEVLQR.K      | 1398.19 | 2 | 62  | 2.50E-05 | 1.03 | F | F1 |
| FBgn0003470 | R.MQHNLEQQIQAR.N                 | 769.38  | 2 | 62  | 2.90E-05 | 0.91 | F | F2 |
| FBgn0003470 | K.HANLFHQWLTETR.T                | 849.44  | 2 | 63  | 3.00E-05 | 0.93 | F | F5 |
| FBgn0003470 | K.KHQAVLAEINNHEAR.L              | 907.47  | 2 | 64  | 2.80E-05 | 1.08 | F | F5 |
| FBgn0003470 | K.ETFVTADEFGQDLEHVEVLQR.K        | 836.42  | 3 | 66  | 1.20E-05 | 1.30 | F | F1 |
| FBgn0003470 | K.FIESGHFDADNIR.N                | 781.87  | 2 | 67  | 6.60E-06 | 1.01 | F | F1 |
| FBgn0003470 | K.HQLVEADIVAHEDR.I               | 837.42  | 2 | 68  | 1.00E-05 | 1.09 | F | F5 |
| FBgn0003470 | K.HALLEADVMAHQDR.I               | 824.41  | 2 | 72  | 3.20E-06 | 0.98 | F | F5 |
| FBgn0003470 | K.KIEELGALLEEHLILDNR.Y           | 1095.1  | 2 | 83  | 1.60E-07 | 0.95 | F | F2 |
| FBgn0003470 | K.KHQLVEADIVAHEDR.I              | 922.47  | 2 | 84  | 3.10E-07 | 1.12 | F | F5 |
| FBgn0003470 | K.QHLLDSLQVQQLFR.D               | 883.99  | 2 | 84  | 2.20E-07 | 1.53 | F | F3 |
| FBgn0003470 | K.HQAFEAELAANADR.I               | 792.88  | 2 | 87  | 6.40E-08 | 1.01 | F | F2 |
| FBgn0003470 | K.KHEALVSDLEAFGNTIQALQEAK.N      | 922.81  | 3 | 93  | 2.90E-08 | 1.02 | F | F1 |
| FBgn0003470 | K.ADVVESWIDDKENYVR.S             | 1011.49 | 2 | 95  | 1.40E-08 | 1.05 | F | F1 |

|             |                               |         |   |     |          |      |   |    |
|-------------|-------------------------------|---------|---|-----|----------|------|---|----|
| FBgn0003471 | K.HRPDLVQFEK.L                | 679.87  | 2 | 39  | 0.0084   | 0.95 | F | F3 |
| FBgn0003471 | R.QLLHVEHPNSDEILER.Q          | 987.51  | 2 | 46  | 0.0016   | 1.02 | F | F5 |
| FBgn0003471 | K.DGWHEELHQMWENR.Q            | 886.38  | 2 | 47  | 0.0002   | 1.23 | F | F2 |
| FBgn0003471 | K.NQSLATEIDNHEPR.I            | 833.4   | 2 | 55  | 0.0002   | 1.09 | F | F1 |
| FBgn0003471 | K.VGSELITEGHFGADR.I           | 816.91  | 2 | 55  | 0.00017  | 0.73 | F | F3 |
| FBgn0003471 | K.KFEALISDLTQK.W              | 759.92  | 2 | 58  | 9.80E-05 | 0.76 | F | F1 |
| FBgn0003471 | K.KHEAIETDIFAYEER.V           | 967.96  | 2 | 58  | 5.30E-05 | 1.30 | F | F1 |
| FBgn0003471 | R.QNHLNQEWSTLR.E              | 784.39  | 2 | 68  | 7.70E-06 | 1.05 | F | F2 |
| FBgn0003471 | K.INTLLQVADTLVEK.D            | 823.99  | 2 | 69  | 3.70E-06 | 1.65 | F | F1 |
| FBgn0003471 | K.KHENLEQSVEDYANTIR.Q         | 1065.51 | 2 | 69  | 5.30E-06 | 0.85 | F | F3 |
| FBgn0003471 | R.EVVAGSQELGQDFDHVTLLSER.F    | 1237.62 | 2 | 89  | 7.40E-08 | 1.03 | F | F1 |
| FBgn0003721 | K.YKDECEEFHKR.L               | 838.39  | 2 | 38  | 0.0031   | 1.39 | F | F3 |
| FBgn0003721 | K.ALQNAESEVAALNR.R            | 764.4   | 2 | 46  | 0.0017   | 0.97 | F | F1 |
| FBgn0003721 | K.LAMVEADLER.A                | 594.8   | 2 | 46  | 0.0021   | 1.41 | F | F2 |
| FBgn0003721 | R.RIQLLEEDLER.S               | 728.39  | 2 | 46  | 0.0018   | 0.85 | F | F2 |
| FBgn0003721 | K.EVDRLEDDLNVNR.G             | 814.41  | 2 | 47  | 0.0011   | 0.83 | F | F3 |
| FBgn0003721 | R.REEAESEVAALNR.R             | 758.37  | 2 | 59  | 7.20E-05 | 0.83 | F | F3 |
| FBgn0003721 | K.LSEASQAADER.A               | 717.82  | 2 | 81  | 1.50E-07 | 1.04 | F | F1 |
| FBgn0003721 | K.KIQTVENELDQTQEALTLVTGK.L    | 1292.69 | 2 | 90  | 4.20E-08 | 0.82 | F | F1 |
| FBgn0003721 | K.IQTVENELDQTQEALTLVTGK.L     | 1207.63 | 2 | 91  | 4.00E-08 | 1.13 | F | F1 |
| FBgn0003738 | K.KPDIDGFLVGGASLKPEFVDIINAR.Q | 1399.26 | 2 | 55  | 7.80E-05 | 1.04 | F | F1 |
| FBgn0003738 | K.DIGADWVILGHSER.R            | 805.4   | 2 | 76  | 1.40E-06 | 0.88 | F | F3 |
| FBgn0003884 | R.IHFPLVTYAPVISA.EK.A         | 938.04  | 2 | 39  | 0.0044   | 1.29 | F | F1 |
| FBgn0003884 | R.NLDIERPTYTNLNR.L            | 880.95  | 2 | 42  | 0.0044   | 0.89 | F | F1 |
| FBgn0003887 | K.LTPTYGDLNHLVSLTMSGVTTCLR.F  | 931.47  | 3 | 42  | 0.0029   | 1.62 | F | F2 |
| FBgn0003887 | R.SGPFQIFRPDNFVFGQSGAGNNWAK.G | 1441.71 | 2 | 77  | 8.70E-07 | 0.95 | F | F1 |
| FBgn0004117 | K.SLADEMDSTFAELAGY.-          | 881.39  | 2 | 39  | 0.0014   | 1.08 | F | F1 |
| FBgn0004117 | K.LLTATESEVATQNR.K            | 787.91  | 2 | 56  | 0.00016  | 1.14 | F | F1 |
| FBgn0004117 | K.LAFVEDELEVAEDR.V            | 838.91  | 2 | 68  | 1.00E-05 | 0.94 | F | F1 |
| FBgn0004117 | K.LLEATQSADENNR.M             | 751.86  | 2 | 74  | 1.40E-06 | 1.05 | F | F1 |
| FBgn0004117 | R.KLAFVEDELEVAEDR.V           | 923.97  | 2 | 105 | 2.20E-09 | 0.94 | F | F1 |
| FBgn0004167 | K.AWQILEYAEHHR.E              | 533.27  | 3 | 29  | 0.062    | 1.28 | F | F5 |
| FBgn0004169 | K.AQELWELIVK.L                | 656.87  | 2 | 52  | 0.00045  | 1.09 | F | F1 |
| FBgn0004363 | K.TSSGIEFNTAGHSNQESGK.V       | 1017.96 | 2 | 58  | 2.80E-05 | 1.02 | F | F1 |
| FBgn0004363 | K.DFVLHTAVNDGQEFSGSIFQR.T     | 1205.09 | 2 | 102 | 3.70E-09 | 1.01 | F | F1 |
| FBgn0004397 | K.ELTHQVHSEILVR.C             | 534.96  | 3 | 33  | 0.039    | 0.82 | F | F5 |
| FBgn0004397 | K.IAEILLSSAAQVDSLTPQLISAGR.I  | 832.47  | 3 | 57  | 2.60E-05 | 1.37 | F | F1 |
| FBgn0004507 | R.HLHYTLVK.D                  | 547.8   | 2 | 30  | 0.055    | 0.39 | F | F3 |
| FBgn0004507 | K.FFNDGDYIQA.VLDR.N           | 857.92  | 2 | 48  | 0.00077  | 0.92 | F | F1 |
| FBgn0004507 | R.WPVSLLESILPR.H              | 726.42  | 2 | 50  | 0.00025  | 0.97 | F | F1 |
| FBgn0004507 | K.VAIQLNDTHPSLAIPELMR.I       | 1080.58 | 2 | 70  | 4.50E-06 | 1.39 | F | F1 |
| FBgn0004551 | K.FSIPVLLDET.LK.F             | 779.45  | 2 | 75  | 1.10E-06 | 1.42 | F | F1 |

|             |                               |         |   |     |          |      |   |    |
|-------------|-------------------------------|---------|---|-----|----------|------|---|----|
| FBgn0004611 | K.AAQVVALSASHEDGGVTR.S        | 919.96  | 2 | 59  | 7.10E-05 | 0.43 | F | F3 |
| FBgn0004624 | K.ITEQLIEAINSGDFDGYTK.I       | 1099.54 | 2 | 92  | 3.70E-08 | 1.35 | F | F1 |
| FBgn0004873 | K.ISAGPQSHILEGVTWDEASR.L      | 1099.54 | 2 | 107 | 9.30E-10 | 0.86 | F | F1 |
| FBgn0004907 | R.YLAEVATGDAR.N               | 605.81  | 2 | 47  | 0.0012   | 0.94 | F | F1 |
| FBgn0004907 | K.SVTETGVELSNEER.N            | 796.38  | 2 | 49  | 0.00046  | 0.96 | F | F1 |
| FBgn0004907 | K.QAFDDAIAELDTLNEDSYK.D       | 1121.52 | 2 | 69  | 3.50E-06 | 1.18 | F | F1 |
| FBgn0005384 | K.HVINFDLPSDVEEYVHR.I         | 705.35  | 3 | 68  | 6.80E-06 | 0.85 | F | F4 |
| FBgn0005533 | K.LLDFHNIR.G                  | 535.29  | 2 | 40  | 0.0046   | 1.22 | F | F2 |
| FBgn0005533 | K.IAGYVTHLMGR.L               | 630.34  | 2 | 89  | 1.10E-07 | 1.28 | F | F1 |
| FBgn0005634 | K.REEELTQTLLR.I               | 715.39  | 2 | 36  | 0.017    | 1.08 | F | F2 |
| FBgn0005634 | K.ALEAEVLQLTEDLASSER.A        | 1008.52 | 2 | 87  | 1.30E-07 | 1.38 | F | F1 |
| FBgn0005664 | K.GQYSLIEPDGTR.R              | 690.85  | 2 | 33  | 0.025    | 0.57 | F | F1 |
| FBgn0005664 | R.LLNNDLWQLDR.L               | 721.38  | 2 | 42  | 0.0042   | 0.82 | F | F1 |
| FBgn0005664 | R.FNSLEELQTR.L                | 639.82  | 2 | 47  | 0.0014   | 0.98 | F | F1 |
| FBgn0005664 | R.RLLNNDLWQLDR.L              | 799.43  | 2 | 57  | 0.00015  | 0.82 | F | F2 |
| FBgn0005666 | R.FLKPHIDR.V                  | 555.31  | 2 | 29  | 0.041    | 1.09 | F | F2 |
| FBgn0005666 | K.AGPSDPSEQTNWHVAKPR.F        | 1031    | 2 | 33  | 0.023    | 0.28 | F | F3 |
| FBgn0005666 | K.NPFDVSAAPGLPELEDWDEHHVK.L   | 1356.64 | 2 | 34  | 0.015    | 1.40 | F | F1 |
| FBgn0005666 | R.YRDPPEPPKPR.I               | 824.41  | 2 | 38  | 0.01     | 0.93 | F | F1 |
| FBgn0005666 | R.ADNLIENHDYSFR.V             | 819.89  | 2 | 45  | 0.0008   | 0.76 | F | F1 |
| FBgn0005666 | K.AGFSDPSDATEPHLAKPR.N        | 993.5   | 2 | 55  | 0.00016  | 1.02 | F | F1 |
| FBgn0005666 | R.VLAVNEAGPGHPSKSPDPMTAEHQR.Y | 905.79  | 3 | 57  | 0.00011  | 1.00 | F | F4 |
| FBgn0005666 | K.NEHGSFDASAHATVLDLDRSPPK.G   | 1212.09 | 2 | 66  | 1.20E-05 | 1.31 | F | F4 |
| FBgn0005666 | R.KVESFLSPLIDQFAK.E           | 924.5   | 2 | 96  | 1.40E-08 | 0.98 | F | F1 |
| FBgn0005671 | R.IPASILAEFYPR.D              | 709.89  | 2 | 30  | 0.058    | 1.15 | F | F1 |
| FBgn0005671 | K.RIPASILAEFYPR.D             | 787.94  | 2 | 58  | 6.40E-05 | 1.00 | F | F2 |
| FBgn0005671 | K.IPIFSAAGLPHNEIAAQICR.Q      | 1112.1  | 2 | 97  | 1.10E-08 | 3.47 | F | F1 |
| FBgn0005671 | K.HVLVILTDMSYAEALR.E          | 980.52  | 2 | 106 | 1.60E-09 | 1.61 | F | F2 |
| FBgn0005776 | R.TVAAEHSAQDLEIHVVPTLQR.L     | 786.08  | 3 | 43  | 0.0025   | 1.15 | F | F4 |
| FBgn0005776 | K.LLLPTVLLLAADPVANVR.F        | 965.6   | 2 | 76  | 3.40E-08 | 0.66 | F | F1 |
| FBgn0010100 | K.VLYSHLDDPANQDIVR.G          | 948.98  | 2 | 59  | 8.20E-05 | 1.21 | F | F1 |
| FBgn0010213 | R.FNGGGHINHTIFWQNLSPNK.S      | 1186.09 | 2 | 41  | 0.0047   | 0.86 | F | F2 |
| FBgn0010213 | R.FNGGGHINHTIFWQNLSPNK.T      | 1183.08 | 2 | 44  | 0.0019   | 0.83 | F | F2 |
| FBgn0010213 | K.HHQTYYNNLNAAEEQLEEAK.S      | 1211.57 | 2 | 91  | 2.60E-08 | 0.91 | F | F3 |
| FBgn0010217 | R.IINVIGEPIDER.G              | 706.9   | 2 | 44  | 0.0022   | 0.92 | F | F1 |
| FBgn0010217 | R.IMDPNIIGQEHYNVAR.G          | 956.48  | 2 | 64  | 2.20E-05 | 0.61 | F | F3 |
| FBgn0010217 | R.DQEGQDVLLFIDNIFR.F          | 982.5   | 2 | 67  | 1.30E-05 | 1.12 | F | F1 |
| FBgn0010217 | R.VALTGLTVAEYFR.D             | 741.41  | 2 | 73  | 2.60E-06 | 0.74 | F | F1 |
| FBgn0010217 | R.FLSQPFQVAEVFTGHAGK.L        | 1024.03 | 2 | 76  | 1.50E-06 | 0.40 | F | F1 |
| FBgn0010217 | K.AHGGYSVFAGVGER.T            | 724.85  | 2 | 85  | 1.50E-07 | 0.19 | F | F2 |
| FBgn0010217 | R.LVLEVAQHLGENTVR.T           | 860.48  | 2 | 93  | 2.20E-08 | 1.06 | F | F1 |
| FBgn0010288 | K.VIHFIALVNK.E                | 687.9   | 2 | 34  | 0.0086   | 1.22 | F | F3 |

|             |                                   |         |   |     |          |      |   |    |
|-------------|-----------------------------------|---------|---|-----|----------|------|---|----|
| FBgn0010352 | K.EETLIHIGNR.F                    | 612.32  | 2 | 31  | 0.039    | 0.87 | F | F2 |
| FBgn0010352 | K.YHLGTYIER.L                     | 597.3   | 2 | 38  | 0.0067   | 0.91 | F | F2 |
| FBgn0010352 | R.FLTALNHSR.D                     | 550.8   | 2 | 54  | 0.0004   | 0.79 | F | F2 |
| FBgn0010397 | R.LNIESPGRPTTDSGISSNGSHLTASASSR.S | 982.16  | 3 | 62  | 2.50E-05 | 1.06 | F | F4 |
| FBgn0010397 | R.HNQYIASLEAELQR.I                | 857.44  | 2 | 66  | 1.80E-05 | 1.06 | F | F2 |
| FBgn0010424 | K.ILEELIEEVEDDKSGR.L              | 979.5   | 2 | 101 | 4.90E-09 | 1.32 | F | F1 |
| FBgn0010434 | K.SPLFTTSATTGPHVESTR.V            | 965.98  | 2 | 74  | 2.50E-06 | 1.02 | F | F1 |
| FBgn0010434 | K.NIDGVTHNVEEEVR.N                | 828.41  | 2 | 76  | 9.40E-07 | 0.98 | F | F3 |
| FBgn0010551 | R.VLSRPDSLNLPLYLHK.Q              | 918.51  | 2 | 33  | 0.02     | 0.79 | F | F2 |
| FBgn0010551 | R.LGGIQSDIYSEGLHVR.I              | 893.46  | 2 | 75  | 2.30E-06 | 1.19 | F | F3 |
| FBgn0010621 | K.HKLDVTS AEDYR.A                 | 759.37  | 2 | 43  | 0.002    | 0.84 | F | F3 |
| FBgn0010621 | R.AFSVALESIPLALAENSGLHPIETLSELK.A | 1045.24 | 3 | 48  | 0.00028  | 1.13 | F | F1 |
| FBgn0011211 | K.GIRPAINVGLSVSR.V                | 740.94  | 2 | 36  | 0.0065   | 0.81 | F | F1 |
| FBgn0011211 | R.VLSIGDGIAR.V                    | 523.31  | 2 | 42  | 0.004    | 0.71 | F | F1 |
| FBgn0011211 | R.EVAFAAQFGSDDLDAATQQLNR.G        | 1204.11 | 2 | 112 | 4.20E-10 | 1.09 | F | F1 |
| FBgn0011643 | K.GYGFGGGAGCLSTDTGAHLNRE.-        | 1121.51 | 2 | 109 | 3.20E-10 | 2.05 | F | F3 |
| FBgn0011643 | K.GYGFGGGAGCLSTDTGAHLNRE.E        | 1055.48 | 2 | 111 | 1.90E-10 | 2.50 | F | F3 |
| FBgn0011693 | K.VAIDLQDNLEEFVK.L                | 915.49  | 2 | 30  | 0.063    | 1.17 | F | F1 |
| FBgn0011770 | K.ALIGHFQIAQVPHR.H                | 543.64  | 3 | 51  | 0.00042  | 0.72 | F | F5 |
| FBgn0013733 | R.LLVSAHKPTLQHqidTHEPIYR.E        | 894.15  | 3 | 29  | 0.044    | 1.03 | F | F5 |
| FBgn0013733 | R.RFDSIVEQIQR.K                   | 716.88  | 2 | 31  | 0.06     | 1.01 | F | F2 |
| FBgn0013733 | K.RGEFLDDVYNR.L                   | 713.34  | 2 | 34  | 0.014    | 1.15 | F | F2 |
| FBgn0013733 | K.HFQELGHDVVDHLAGTPDAQAVEIK.L     | 937.47  | 3 | 50  | 0.00051  | 1.11 | F | F4 |
| FBgn0013733 | R.EFVSDVIGHQADLR.F                | 815.92  | 2 | 50  | 0.00054  | 2.42 | F | F3 |
| FBgn0013733 | K.ISPLELWLDNTER.S                 | 815.94  | 2 | 52  | 0.00041  | 1.12 | F | F1 |
| FBgn0013733 | R.DGHNLLSLEVLSEHLPR.E             | 715.39  | 3 | 52  | 0.00034  | 1.24 | F | F4 |
| FBgn0013733 | R.VQALFDWLDHAEHK.L                | 896.95  | 2 | 57  | 0.00011  | 1.25 | F | F1 |
| FBgn0013733 | R.AAGGDADHLTSEVDGLADR.M           | 957.95  | 2 | 59  | 3.70E-05 | 1.13 | F | F1 |
| FBgn0013733 | R.HEIDQTKPEVEQVR.R                | 899.47  | 2 | 82  | 4.30E-07 | 1.33 | F | F3 |
| FBgn0014002 | R.DDILFVTISSDEEDHTR.I             | 1018.98 | 2 | 57  | 5.10E-05 | 1.29 | F | F1 |
| FBgn0014027 | K.SLIADGLVHGIHQACK.A              | 901.97  | 2 | 41  | 0.0056   | 2.21 | F | F3 |
| FBgn0014027 | K.LVTALCNEHQIPLIR.V               | 911.51  | 2 | 83  | 2.10E-07 | 2.32 | F | F1 |
| FBgn0014141 | K.FNGVHIPDSPFR.I                  | 715.87  | 2 | 32  | 0.036    | 0.98 | F | F1 |
| FBgn0014141 | K.EGQTHADNIFSVDR.N                | 866.4   | 2 | 55  | 7.20E-05 | 1.15 | F | F1 |
| FBgn0014189 | K.GTYVSIHSSGFR.D                  | 676.83  | 2 | 45  | 0.0013   | 1.16 | F | F2 |
| FBgn0014869 | R.ILIAAHGNSLR.G                   | 603.85  | 2 | 60  | 2.80E-05 | 0.75 | F | F2 |
| FBgn0014869 | K.DAGLEFDVAHTSVLTR.A              | 886.95  | 2 | 66  | 1.60E-05 | 0.90 | F | F1 |
| FBgn0015221 | K.RGTLEVDELHSLALALDTEK.Q          | 767.42  | 3 | 30  | 0.047    | 1.52 | F | F1 |
| FBgn0015221 | R.DPELAHYFEENFLGK.Q               | 949.97  | 2 | 52  | 0.00027  | 1.87 | F | F1 |
| FBgn0015324 | K.VREDHVSSVLDDAR.K                | 547.27  | 3 | 41  | 0.0048   | 0.90 | F | F5 |
| FBgn0015324 | R.EDHVSSVLDDAR.K                  | 692.82  | 2 | 44  | 0.00077  | 1.51 | F | F3 |
| FBgn0015390 | K.SESRPESVIASGEPVPR.E             | 919.97  | 2 | 29  | 0.076    | 1.18 | F | F3 |



|             |                                      |         |   |     |          |      |   |    |
|-------------|--------------------------------------|---------|---|-----|----------|------|---|----|
| FBgn0015390 | K.DVSRPASVVESVKDEHDKAESR.R           | 856.09  | 3 | 37  | 0.011    | 0.33 | F | F4 |
| FBgn0015390 | R.QGILASSRPESVASQPESVSPSPQSAASHEHK.E | 1125.9  | 3 | 43  | 0.0019   | 0.98 | F | F4 |
| FBgn0015567 | K.VGGYILGEFGNLIAGDSR.S               | 941.99  | 2 | 61  | 5.00E-05 | 0.94 | F | F1 |
| FBgn0015778 | K.KYYYVHNDIFR.Y                      | 719.86  | 2 | 40  | 0.005    | 1.01 | F | F2 |
| FBgn0015778 | R.FYNHNSSYIHGESK.L                   | 883.89  | 2 | 49  | 0.0002   | 0.88 | F | F2 |
| FBgn0016120 | R.DAFPDSALDPLNKPTFWPHTPEEQVGYS.K     | 1109.21 | 3 | 54  | 0.00013  | 1.07 | F | F1 |
| FBgn0016120 | K.SKEQLEAEAQGHH.-                    | 774.36  | 2 | 71  | 2.60E-06 | 1.47 | F | F1 |
| FBgn0016724 | R.DFGYPYEFELK.S                      | 746.34  | 2 | 31  | 0.019    | 0.92 | F | F1 |
| FBgn0016724 | K.SSTSLSEVQAGNGNVAER.G               | 925.94  | 2 | 34  | 0.0098   | 0.71 | F | F1 |
| FBgn0016724 | K.AFQLALDYPPFR.A                     | 691.86  | 2 | 55  | 0.00018  | 0.73 | F | F1 |
| FBgn0016724 | R.AVVSLQSGIEAEHEVDVFGMCPTHTSTSK.V    | 1105.21 | 3 | 62  | 2.00E-05 | 1.13 | F | F1 |
| FBgn0016724 | K.LDAVEHTTLIIVDLR.D                  | 875.5   | 2 | 85  | 9.90E-08 | 0.99 | F | F2 |
| FBgn0016724 | K.EKPIIISIAELLGDRK.G                 | 1004.58 | 2 | 88  | 2.70E-08 | 0.66 | F | F1 |
| FBgn0016724 | K.MLNQITSSSLADTLFK.T                 | 883.47  | 2 | 88  | 1.10E-07 | 0.83 | F | F1 |
| FBgn0016724 | K.EKPIIISIAELLGDR.K                  | 919.53  | 2 | 90  | 2.40E-08 | 1.49 | F | F1 |
| FBgn0016724 | K.LNGNLVEYPQHLSGLHAWR.R              | 1123.58 | 2 | 90  | 5.30E-08 | 0.98 | F | F5 |
| FBgn0017539 | R.GVLALNLEDGTLHR.F                   | 775.42  | 2 | 55  | 0.0002   | 1.09 | F | F3 |
| FBgn0017539 | K.QYPVVDHAYDAIVVGAGGAGLR.A           | 1135.59 | 2 | 85  | 1.70E-07 | 1.35 | F | F2 |
| FBgn0017539 | K.DVIVPGLYAAGEAASSSVHGANKR.L         | 1142.08 | 2 | 90  | 6.30E-08 | 0.36 | F | F3 |
| FBgn0017645 | K.AGFTPLHLSSQEGHAEISNLLIEHK.A        | 938.15  | 3 | 39  | 0.0072   | 0.73 | F | F4 |
| FBgn0017645 | K.FIGPVVMEVPHFASLR.G                 | 922.51  | 2 | 39  | 0.0078   | 0.82 | F | F1 |
| FBgn0019624 | K.ITPTLQELGIPTIEELGYDKPELALK.S       | 1504.33 | 2 | 36  | 0.0043   | 1.20 | F | F1 |
| FBgn0019624 | R.RVNDIALAIR.W                       | 591.85  | 2 | 52  | 0.00025  | 0.77 | F | F3 |
| FBgn0019652 | K.VLHPNEGNHALQEFLAAR.N               | 686.69  | 3 | 41  | 0.0056   | 0.92 | F | F5 |
| FBgn0019652 | R.IHEEYGAIFDHLFR.Q                   | 894.94  | 2 | 50  | 0.00055  | 1.52 | F | F5 |
| FBgn0019960 | K.IFHIHAESDK.L                       | 640.82  | 2 | 33  | 0.019    | 0.91 | F | F2 |
| FBgn0020235 | R.ELIEIISGAAALT.-                    | 673.39  | 2 | 39  | 0.007    | 0.77 | F | F1 |
| FBgn0020238 | K.AASDIAMNDLPPTHPIR.L                | 930.97  | 2 | 58  | 9.70E-05 | 0.96 | F | F1 |
| FBgn0020238 | K.AAFDDAIAELDTLSEESYK.D              | 1086.51 | 2 | 102 | 2.20E-09 | 0.83 | F | F1 |
| FBgn0020240 | K.ATFLESLSR.E                        | 601.81  | 2 | 42  | 0.0047   | 1.18 | F | F2 |
| FBgn0020254 | R.LVAAATHSLVEAAQNLVR.G               | 953.04  | 2 | 108 | 4.00E-10 | 1.11 | F | F1 |
| FBgn0020367 | K.LPANHPLLGTQR.V                     | 681.39  | 2 | 33  | 0.032    | 0.99 | F | F1 |
| FBgn0020367 | K.HTMLQVWPVR.H                       | 654.85  | 2 | 36  | 0.016    | 1.04 | F | F2 |
| FBgn0020367 | K.VGSHITGGDLYGLVHENTLVK.L            | 1147.09 | 2 | 56  | 0.00015  | 0.64 | F | F1 |
| FBgn0020368 | K.LPANHPLFTGQR.V                     | 696.88  | 2 | 45  | 0.0019   | 1.26 | F | F1 |
| FBgn0020368 | K.ADYDQLYEDLQQAQR.N                  | 958.94  | 2 | 47  | 0.00058  | 1.32 | F | F1 |
| FBgn0020369 | R.IDILDPAALLRPRG.I                   | 745.94  | 2 | 37  | 0.003    | 1.25 | F | F3 |
| FBgn0020369 | R.EHAPSIIFMDEIDSIGSSR.I              | 1075.03 | 2 | 68  | 7.70E-06 | 0.74 | F | F1 |
| FBgn0020415 | K.VLLSVGGDHDIDPDHPNK.Y               | 1006.49 | 2 | 32  | 0.036    | 0.77 | F | F1 |
| FBgn0020415 | K.LFTGDFIVDPHAALHK.E                 | 936.01  | 2 | 38  | 0.011    | 1.17 | F | F1 |
| FBgn0020439 | K.EVHNISHYPRPAVK.Y                   | 868.97  | 2 | 34  | 0.028    | 0.85 | F | F5 |
| FBgn0022160 | R.IHPEFPYIDAEIR.Y                    | 821.42  | 2 | 35  | 0.023    | 1.12 | F | F1 |

|             |                                       |         |   |    |          |      |   |    |
|-------------|---------------------------------------|---------|---|----|----------|------|---|----|
| FBgn0022160 | R.NHIVHVSPSNLITIAGGK.W                | 971.04  | 2 | 92 | 3.00E-08 | 1.20 | F | F2 |
| FBgn0022343 | R.AAPDITNTEFFPTLSAARPEEQR.K           | 869.44  | 3 | 30 | 0.048    | 1.64 | F | F1 |
| FBgn0022343 | R.YSQQAGSGLGGGPTGGALRPR.R             | 678.02  | 3 | 46 | 0.0017   | 1.15 | F | F2 |
| FBgn0022959 | R.EDVVFVHQSIAIAR.N                    | 707.36  | 2 | 37 | 0.012    | 0.98 | F | F1 |
| FBgn0022959 | R.GLGGGDGSAEPGVHDQNPEGLQR.G           | 1145.03 | 2 | 58 | 4.30E-05 | 1.18 | F | F3 |
| FBgn0023023 | R.FIPTPVRPPFVYDIIEGK.V                | 1086.61 | 2 | 52 | 0.00021  | 0.89 | F | F1 |
| FBgn0023023 | R.LLAEGINGPEGHELRSRPEEVEAEAVHR.A      | 994.17  | 3 | 74 | 1.80E-06 | 0.89 | F | F5 |
| FBgn0023143 | K.LPGIQPLEILDSIK.K                    | 810.48  | 2 | 33 | 0.011    | 0.84 | F | F1 |
| FBgn0023143 | R.QFLFRPHDVQKPK.S                     | 888.01  | 2 | 35 | 0.013    | 1.25 | F | F1 |
| FBgn0023143 | K.AHNGALPRPWNEEDANSFLEVVR.A           | 889.45  | 3 | 41 | 0.0035   | 1.00 | F | F4 |
| FBgn0023143 | K.NFPNAIEHTLQWAR.D                    | 869.94  | 2 | 63 | 2.90E-05 | 0.82 | F | F2 |
| FBgn0023143 | K.FAHENGIALIAETR.G                    | 848.96  | 2 | 81 | 4.20E-07 | 1.12 | F | F3 |
| FBgn0023213 | K.LSENENAWRPR.V                       | 708.86  | 2 | 29 | 0.049    | 1.07 | F | F3 |
| FBgn0023213 | R.HQQQNNVGGNVSGGAGHSNGNNDENTWHVQTSK.G | 1188.2  | 3 | 45 | 0.00029  | 1.12 | F | F4 |
| FBgn0024733 | K.YRPEHGPIAAWEK.A                     | 819.41  | 2 | 64 | 2.30E-05 | 1.05 | F | F2 |
| FBgn0024923 | K.KNVFIIGATNRPDIIDPAILRPGR.L          | 910.86  | 3 | 28 | 0.014    | 0.85 | F | F4 |
| FBgn0024957 | R.TVHIPSQEELDIFDAAER.Y                | 1058.03 | 2 | 50 | 0.00051  | 1.29 | F | F1 |
| FBgn0025725 | R.TVAFHHEYPWILSASDDQTIR.I             | 844.42  | 3 | 31 | 0.038    | 1.02 | F | F4 |
| FBgn0025725 | R.LLELAPRPDVAQQVR.K                   | 875.51  | 2 | 58 | 4.40E-05 | 1.17 | F | F1 |
| FBgn0026093 | K.VNLQHALGLR.L                        | 581.84  | 2 | 59 | 4.70E-05 | 0.68 | F | F2 |
| FBgn0026093 | K.AHGIGVHSAEEIEEFK.N                  | 947.45  | 2 | 63 | 2.40E-05 | 1.24 | F | F2 |
| FBgn0026210 | K.APSSLLDALEQHLATLEGR.K               | 1032.05 | 2 | 90 | 5.60E-08 | 1.05 | F | F1 |
| FBgn0026418 | K.FNDPHVQHELTSIPAR.V                  | 953.49  | 2 | 47 | 0.0015   | 1.16 | F | F5 |
| FBgn0026708 | K.SGQVVPGYGHAVLR.K                    | 742.91  | 2 | 56 | 0.00015  | 0.97 | F | F2 |
| FBgn0026708 | R.ALGVLASLVWDR.A                      | 671.38  | 2 | 72 | 3.10E-06 | 0.84 | F | F1 |
| FBgn0027088 | R.SAYDLGQHTAATGVR.L                   | 796.4   | 2 | 45 | 0.0017   | 1.10 | F | F1 |
| FBgn0027552 | R.ATLHAIDVGYR.H                       | 630.84  | 2 | 38 | 0.0093   | 1.14 | F | F1 |
| FBgn0027571 | K.RGHENNVFFLTNVGK.L                   | 972.98  | 2 | 42 | 0.0037   | 0.72 | F | F3 |
| FBgn0027571 | K.AIPNHFFR.G                          | 522.27  | 2 | 47 | 0.0013   | 0.87 | F | F3 |
| FBgn0027571 | R.AAPQLDLGGGHYVPR.Q                   | 796.91  | 2 | 49 | 0.00076  | 1.01 | F | F3 |
| FBgn0027580 | R.LQVEHTVTEETGIDLVSQIR.V              | 851.8   | 3 | 32 | 0.03     | 1.30 | F | F2 |
| FBgn0027580 | K.SVVEYLQGSIGIPHGGFPEPLR.S            | 1199.15 | 2 | 61 | 3.80E-05 | 1.08 | F | F1 |
| FBgn0028325 | R.SATEFAINYVNTHGPLVMETNTYR.Y          | 924.12  | 3 | 33 | 0.021    | 0.90 | F | F1 |
| FBgn0028479 | K.RGTRPVNNDALIVK.Q                    | 883.49  | 2 | 33 | 0.024    | 0.92 | F | F3 |
| FBgn0028479 | K.LGLPEVMLGLLPGGGTVR.L                | 939.54  | 2 | 62 | 1.30E-05 | 0.98 | F | F1 |
| FBgn0028482 | R.LHLVENHPEFGR.A                      | 746.89  | 2 | 49 | 0.00083  | 1.06 | F | F5 |
| FBgn0028544 | K.GIPVPVHVDRPYPVVEK.R                 | 1061.58 | 2 | 48 | 0.0007   | 1.06 | F | F4 |
| FBgn0028544 | K.AVNVQVPVHVDRPYPVYVK.V               | 1132.12 | 2 | 50 | 0.00034  | 0.88 | F | F1 |
| FBgn0028688 | R.LDYLIHPHYR.Y                        | 456.91  | 3 | 40 | 0.005    | 1.16 | F | F5 |
| FBgn0028688 | R.LGLFYLDHDLITR.N                     | 809.44  | 2 | 66 | 1.70E-05 | 0.64 | F | F1 |
| FBgn0029875 | R.TTTTSTRPDQPDGEVLHTSK.T              | 754.38  | 3 | 30 | 0.049    | 1.13 | F | F1 |
| FBgn0029875 | R.RQPVEEDFSTHGFPSVR.T                 | 678.33  | 3 | 35 | 0.0086   | 1.09 | F | F5 |

|             |                                |         |   |     |          |      |   |    |
|-------------|--------------------------------|---------|---|-----|----------|------|---|----|
| FBgn0029875 | R.NVFEPVHETHVDSEPTGR.R         | 699     | 3 | 36  | 0.0074   | 1.25 | F | F4 |
| FBgn0030086 | R.ALLSLPTAIADNAGYDSAQLVSEL.R.A | 877.47  | 3 | 36  | 0.01     | 0.91 | F | F1 |
| FBgn0030086 | R.NAGHVEVTNDGATILR.A           | 854.94  | 2 | 54  | 0.00023  | 1.15 | F | F3 |
| FBgn0030106 | K.EVPLGEHNYHVNQFDR.I           | 999.98  | 2 | 76  | 8.20E-07 | 1.15 | F | F5 |
| FBgn0031035 | K.HPELESIPNLHVIK.A             | 855.46  | 2 | 47  | 0.0016   | 0.97 | F | F2 |
| FBgn0031035 | R.HYYWYLTNEGIEELR.S            | 1014.47 | 2 | 78  | 5.50E-07 | 0.86 | F | F2 |
| FBgn0031092 | R.KFEAAEAHSSGLVSR.L            | 836.92  | 2 | 82  | 4.20E-07 | 1.06 | F | F3 |
| FBgn0031092 | K.LNLLSEDFQAQAVAAQLTK.D        | 1011.57 | 2 | 94  | 1.30E-08 | 1.07 | F | F1 |
| FBgn0031438 | -.MGYIFHETFGR.T                | 701.84  | 2 | 43  | 0.0011   | 0.78 | F | F2 |
| FBgn0031438 | R.MGYIFHETFGR.T                | 701.84  | 2 | 43  | 0.0011   | 0.78 | F | F2 |
| FBgn0032350 | K.VVATPHLGASTSEAQVR.V          | 882.97  | 2 | 54  | 0.00024  | 0.92 | F | F1 |
| FBgn0032453 | R.EWHHWLVGNIPGGDVAK.G          | 1000    | 2 | 82  | 3.50E-07 | 0.71 | F | F2 |
| FBgn0032721 | K.RLDEILEFANSNFR.M             | 884.96  | 2 | 51  | 0.00051  | 1.24 | F | F2 |
| FBgn0032721 | K.SLADVVAHEIAHSWTGNLVTNK.N     | 1223.64 | 2 | 80  | 6.40E-07 | 0.74 | F | F1 |
| FBgn0032729 | R.FPFLGVHFTPR.M                | 681.88  | 2 | 57  | 0.00014  | 1.18 | F | F1 |
| FBgn0033109 | R.HGLIFTTGFNR.S                | 652.84  | 2 | 33  | 0.034    | 0.70 | F | F2 |
| FBgn0033109 | R.TLTEPVVDLVFHQR.R             | 848.46  | 2 | 70  | 5.20E-06 | 1.15 | F | F3 |
| FBgn0033434 | K.ELLHIHSTVASLR.K              | 507.63  | 3 | 34  | 0.022    | 1.00 | F | F5 |
| FBgn0033465 | K.DDRIPVDHNLALYEGPEQR.F        | 760.38  | 3 | 30  | 0.048    | 1.21 | F | F4 |
| FBgn0033465 | K.HQPGLVEHTIGWPLDR.F           | 950.5   | 2 | 41  | 0.005    | 1.77 | F | F5 |
| FBgn0033465 | R.IPVDHNLALYEGPEQR.F           | 946.99  | 2 | 66  | 1.70E-05 | 1.25 | F | F1 |
| FBgn0033728 | K.ATSPDSSDVIIAR.G              | 687.35  | 2 | 51  | 0.00056  | 0.95 | F | F1 |
| FBgn0033886 | R.INELLNPPSAHQ.R.G             | 822.93  | 2 | 57  | 0.00015  | 0.95 | F | F2 |
| FBgn0033914 | R.KHFLQQALQR.A                 | 676.88  | 2 | 28  | 0.066    | 1.08 | F | F2 |
| FBgn0033914 | K.HLPTLTHDELTTVR.K             | 558.97  | 3 | 31  | 0.047    | 0.95 | F | F5 |
| FBgn0034079 | R.VAADFLHTQLNR.N               | 713.88  | 2 | 66  | 1.70E-05 | 1.00 | F | F3 |
| FBgn0034079 | K.LFPLFDSAYQGFASGDPDR.D        | 1073.01 | 2 | 88  | 7.60E-08 | 1.12 | F | F1 |
| FBgn0034229 | K.QAVNAFADLTHSEFLSGLTGLK.R     | 825.43  | 3 | 31  | 0.053    | 0.74 | F | F1 |
| FBgn0034229 | K.VPLLSNVQDFGDFLSQSGK.T        | 1068.05 | 2 | 80  | 7.80E-07 | 0.68 | F | F1 |
| FBgn0034433 | K.LLLDGISTSQASHLR.H            | 826.96  | 2 | 87  | 9.80E-08 | 1.12 | F | F1 |
| FBgn0034618 | K.EAGYNVIHFTPIQELGGS.R.S       | 1067.05 | 2 | 32  | 0.038    | 1.15 | F | F1 |
| FBgn0034618 | K.ETESHSHIPSEGDAAEHILYR.L      | 818.39  | 3 | 50  | 0.00041  | 1.04 | F | F4 |
| FBgn0034718 | K.SNAGDIITTPVRPIEPHQVINGH.-    | 871.13  | 3 | 28  | 0.08     | 0.86 | F | F4 |
| FBgn0034968 | K.HPHDVIDELNEGSIEVPAE.-        | 1071.5  | 2 | 49  | 0.0004   | 1.41 | F | F3 |
| FBgn0034968 | K.HSGNIGFEDILAIAR.V            | 827.94  | 2 | 106 | 1.70E-09 | 1.00 | F | F3 |
| FBgn0035060 | K.RFEEIFR.Q                    | 519.77  | 2 | 43  | 0.0022   | 0.89 | F | F3 |
| FBgn0035147 | R.YFNPVGAHISGR.I               | 680.34  | 2 | 32  | 0.047    | 0.96 | F | F2 |
| FBgn0035147 | R.RPSLSVYGSDFPTHDTGTGVR.D      | 1095.53 | 2 | 48  | 0.00082  | 0.50 | F | F5 |
| FBgn0035147 | R.DYIHIVDLAEGHVK.A             | 846.94  | 2 | 51  | 0.00057  | 0.86 | F | F2 |
| FBgn0035281 | R.TVEYTADDHNGFNAAVVK.T         | 1050.99 | 2 | 62  | 1.50E-05 | 1.21 | F | F1 |
| FBgn0035281 | K.YHYNYGVADSHTGDVK.S           | 955.42  | 2 | 71  | 1.20E-06 | 1.00 | F | F3 |
| FBgn0035404 | R.KFDLSAPWEQFPNFR.N            | 986.51  | 2 | 41  | 0.0044   | 1.08 | F | F1 |

|             |                               |         |   |     |          |      |   |    |
|-------------|-------------------------------|---------|---|-----|----------|------|---|----|
| FBgn0035404 | R.ILTDYGFEGHPQR.R             | 787.89  | 2 | 69  | 7.60E-06 | 1.03 | F | F1 |
| FBgn0035510 | R.IVEYTADPVHGFNAVVR.R         | 965     | 2 | 57  | 0.00014  | 0.52 | F | F1 |
| FBgn0035600 | K.GGEDYIFSLLTGYHDAPAGVVLR.E   | 1246.63 | 2 | 51  | 0.00042  | 1.06 | F | F2 |
| FBgn0035600 | K.GLFDALDHQSVR.R              | 700.36  | 2 | 56  | 0.00012  | 1.21 | F | F1 |
| FBgn0035905 | R.FPQLTLWLER.M                | 672.88  | 2 | 48  | 0.00098  | 0.76 | F | F1 |
| FBgn0035905 | K.ASDGGDLEPFWSGLDIYER.E       | 1085    | 2 | 63  | 1.50E-05 | 1.08 | F | F1 |
| FBgn0035943 | K.SMPSGPHPVVGSFGTHLTQTFWR.K   | 857.76  | 3 | 41  | 0.0042   | 0.98 | F | F4 |
| FBgn0035943 | R.NHFSTVHGAVEAGYR.E           | 843.91  | 2 | 67  | 8.10E-06 | 0.91 | F | F5 |
| FBgn0036030 | K.VYAILTHGIFSGPAISR.I         | 922.51  | 2 | 77  | 7.20E-07 | 0.48 | F | F2 |
| FBgn0036030 | K.VFSGTSHPDLAQR.I             | 728.86  | 2 | 83  | 2.50E-07 | 0.94 | F | F1 |
| FBgn0036548 | R.FFHAEEDIKPFLER.M            | 995.99  | 2 | 35  | 0.016    | 1.05 | F | F1 |
| FBgn0036548 | R.LVIIIDEIHLHLLHDER.G         | 586.33  | 3 | 38  | 0.009    | 1.67 | F | F5 |
| FBgn0036619 | R.LNHLLNALR.E                 | 496.79  | 2 | 44  | 0.0018   | 0.62 | F | F3 |
| FBgn0036619 | K.APLPVTDTTEEVQQR.L           | 848.43  | 2 | 52  | 0.00037  | 0.85 | F | F1 |
| FBgn0036642 | R.YLQDLLQPAFKPWELVDNAK.T      | 1262.19 | 2 | 55  | 0.00012  | 0.72 | F | F1 |
| FBgn0036642 | R.AVVAVAGQGAAASNHK.E          | 767.9   | 2 | 62  | 4.30E-05 | 1.16 | F | F1 |
| FBgn0036642 | R.NESYDIQGASHLLR.L            | 824.41  | 2 | 75  | 1.70E-06 | 1.00 | F | F1 |
| FBgn0036642 | R.NVLEADALLGAIDGISQSQVQEA.K   | 875.46  | 3 | 100 | 4.40E-09 | 1.46 | F | F1 |
| FBgn0036663 | K.DWDEVYNFPHVR.K              | 809.87  | 2 | 54  | 0.0001   | 0.82 | F | F2 |
| FBgn0036663 | R.AGHFVTVFER.N                | 602.81  | 2 | 54  | 0.00028  | 0.84 | F | F2 |
| FBgn0036680 | R.IGPGTHNNPSVADFR.L           | 813.91  | 2 | 30  | 0.055    | 1.15 | F | F3 |
| FBgn0036927 | K.EYHANIVLDR.F                | 636.33  | 2 | 29  | 0.074    | 0.74 | F | F1 |
| FBgn0036927 | K.KLQLGGYFHNDFFIPNEPYR.I      | 1257.11 | 2 | 33  | 0.018    | 0.76 | F | F1 |
| FBgn0036927 | K.EFPHILNSTR.G                | 628.33  | 2 | 49  | 0.00095  | 0.77 | F | F2 |
| FBgn0036927 | K.LDVPSFDWPIASFPEYR.Y         | 1042.52 | 2 | 50  | 0.00047  | 1.01 | F | F1 |
| FBgn0036927 | K.LQLGGYFHNDFFIPNEPYR.I       | 1169.06 | 2 | 85  | 1.60E-07 | 0.92 | F | F1 |
| FBgn0037001 | R.YYAHWR.R                    | 525.76  | 2 | 29  | 0.061    | 0.82 | F | F3 |
| FBgn0037001 | R.DAFPNATIIRPADIYGSEDR.F      | 1133.56 | 2 | 31  | 0.035    | 1.04 | F | F1 |
| FBgn0037001 | K.HSNVVINLVGR.D               | 625.36  | 2 | 38  | 0.0059   | 0.99 | F | F2 |
| FBgn0037001 | K.RYQLSELVDWFHR.L             | 598.65  | 3 | 40  | 0.0065   | 0.74 | F | F5 |
| FBgn0037001 | R.YQLSELVDWFHR.L              | 817.91  | 2 | 78  | 1.20E-06 | 0.91 | F | F1 |
| FBgn0037138 | K.NFHFIHASADVSVVTSTIR.S       | 758.05  | 3 | 52  | 0.00035  | 0.92 | F | F5 |
| FBgn0037138 | K.LKDFPIANEPILGYLK.D          | 979.05  | 2 | 82  | 3.40E-07 | 0.72 | F | F1 |
| FBgn0037146 | R.LASIVEQVAECHLEGR.E          | 926.97  | 2 | 65  | 1.90E-05 | 2.01 | F | F1 |
| FBgn0037146 | K.EALATVGAEHAVSLVSTR.E        | 928.51  | 2 | 82  | 3.90E-07 | 0.89 | F | F1 |
| FBgn0037607 | K.HLYVPTVPR.S                 | 562.32  | 2 | 30  | 0.042    | 0.77 | F | F2 |
| FBgn0037607 | R.KIDSLEGHPTPR.L              | 774.89  | 2 | 42  | 0.0041   | 0.96 | F | F3 |
| FBgn0037607 | R.VVVVEDHYQQGGLGEAVLSALAGER.N | 1319.69 | 2 | 88  | 7.80E-08 | 1.12 | F | F2 |
| FBgn0038049 | K.NITLIGINRPQQR.N             | 782.95  | 2 | 34  | 0.012    | 1.00 | F | F2 |
| FBgn0038049 | R.ALDLILTRPVGSAEHDIGLVNR.I    | 863.81  | 3 | 51  | 0.00028  | 0.88 | F | F4 |
| FBgn0038110 | R.WLGAADLSHGPAR.A             | 698.37  | 2 | 67  | 1.20E-05 | 0.90 | F | F1 |
| FBgn0038271 | R.IPLHELEQR.I                 | 588.82  | 2 | 57  | 0.00013  | 1.02 | F | F2 |

|             |                                             |         |   |     |          |      |   |    |
|-------------|---------------------------------------------|---------|---|-----|----------|------|---|----|
| FBgn0038271 | K.AVEILADIQNSK.L                            | 749.42  | 2 | 62  | 3.50E-05 | 1.07 | F | F1 |
| FBgn0038271 | K.NNGVAHFLEHMAFK.G                          | 849.91  | 2 | 75  | 1.40E-06 | 0.93 | F | F2 |
| FBgn0038293 | K.FSAIHEFQNLHAVAK.E                         | 898.46  | 2 | 48  | 0.0011   | 1.21 | F | F3 |
| FBgn0038587 | K.GSDVVVIPAGVPR.K                           | 654.37  | 2 | 50  | 0.00042  | 1.23 | F | F1 |
| FBgn0038587 | K.ALVAIITNPVNTCVPIAAEILK.K                  | 802.13  | 3 | 54  | 4.20E-05 | 2.48 | F | F1 |
| FBgn0038587 | R.AFIGHALGVDPQTVQIPVIGGHSGVTILPVLSQSQPLFK.G | 1369.11 | 3 | 67  | 7.00E-07 | 1.04 | F | F1 |
| FBgn0038587 | K.QNPLVTDLALYDIVHTPGVAADLSHIDTK.S           | 1600.83 | 2 | 76  | 8.80E-07 | 0.61 | F | F1 |
| FBgn0038774 | K.KYGVPEEEIFQTADLFR.R                       | 1128.06 | 2 | 42  | 0.0035   | 1.01 | F | F1 |
| FBgn0038774 | K.YGVPEEEIFQTADLFR.R                        | 1043    | 2 | 75  | 1.20E-06 | 1.22 | F | F1 |
| FBgn0038819 | K.GPIHIPVIHNGVPVEPAEVQHAR.A                 | 836.79  | 3 | 45  | 0.0011   | 0.92 | F | F5 |
| FBgn0038819 | R.WEQSHSSHNSYASGYAHK.G                      | 720.64  | 3 | 50  | 5.40E-05 | 0.45 | F | F5 |
| FBgn0038826 | K.DYAFIHFEDR.D                              | 677.81  | 2 | 33  | 0.016    | 1.06 | F | F1 |
| FBgn0038826 | K.EFPVDGALNVLGQFLESNLEHVSNK.S               | 947.49  | 3 | 75  | 1.40E-06 | 1.00 | F | F1 |
| FBgn0038839 | K.ALHLPEGFR.E                               | 541.29  | 2 | 38  | 0.0064   | 0.93 | F | F2 |
| FBgn0038922 | K.LRNDLDLYANVVHVR.S                         | 613.67  | 3 | 30  | 0.049    | 0.68 | F | F5 |
| FBgn0038922 | R.NDLDLYANVVHVR.S                           | 785.41  | 2 | 46  | 0.0014   | 1.08 | F | F3 |
| FBgn0039358 | K.RVNWPHGNYFSQI.-                           | 830.41  | 2 | 53  | 0.00025  | 0.95 | F | F3 |
| FBgn0039358 | K.EHANVIQEA VYQTI VND AIR.T                 | 1163.1  | 2 | 106 | 1.40E-09 | 1.07 | F | F1 |
| FBgn0039359 | K.SLNYNHLMPTR.Y                             | 695.85  | 2 | 29  | 0.067    | 1.06 | F | F2 |
| FBgn0039359 | K.THDDGTPEKPFGRHALVAGIDR.Y                  | 1159.07 | 2 | 72  | 3.20E-06 | 1.17 | F | F4 |
| FBgn0039562 | K.ELETNPELHIR.I                             | 698.37  | 2 | 77  | 1.20E-06 | 1.41 | F | F2 |
| FBgn0039737 | K.DGATLQMGIGSIPDAVLAALHNHK.D                | 838.44  | 3 | 37  | 0.011    | 0.73 | F | F1 |
| FBgn0039737 | R.GDNVPIFLHEIPNLFYK.Q                       | 1050.55 | 2 | 46  | 0.0015   | 0.77 | F | F1 |
| FBgn0039737 | R.AHVHYVVTEHGIASLFGK.N                      | 1028.06 | 2 | 62  | 3.70E-05 | 0.76 | F | F5 |
| FBgn0039737 | K.QIVKPDVSFIHVSPPDNHGYCSLGT SVDCVR.A        | 1191.92 | 3 | 65  | 1.10E-05 | 4.09 | F | F3 |
| FBgn0040064 | R.ITGHLVHELQR.K                             | 448.92  | 3 | 42  | 0.0044   | 1.04 | F | F5 |
| FBgn0040064 | K.EVDFVVEHPRPK.T                            | 828.93  | 2 | 61  | 4.90E-05 | 0.95 | F | F3 |
| FBgn0040064 | K.LNVNGGAIALGHPLGASGR.I                     | 952.02  | 2 | 78  | 7.40E-07 | 0.96 | F | F3 |
| FBgn0040660 | K.NDQIHQAEFHHQQIK.E                         | 978.97  | 2 | 39  | 0.0054   | 0.61 | F | F5 |
| FBgn0040660 | R.LKNDQIHQAEFHHQQIK.E                       | 1120.56 | 2 | 42  | 0.0036   | 0.66 | F | F5 |
| FBgn0040660 | R.HKEFLENLHK.-                              | 710.86  | 2 | 44  | 0.0031   | 0.82 | F | F1 |
| FBgn0041789 | K.AQPQVYQEHSVETR.S                          | 938.95  | 2 | 70  | 3.60E-06 | 0.94 | F | F3 |
| FBgn0050122 | R.LSEESVPENSHYFR.D                          | 868.4   | 2 | 39  | 0.0036   | 0.96 | F | F2 |
| FBgn0051878 | R.YSLVDPDGHR.R                              | 602.3   | 2 | 55  | 0.00011  | 1.31 | F | F1 |
| FBgn0052029 | R.DYQQYQPQQAAYRPPAQAAPQPPRR.I               | 989.83  | 3 | 32  | 0.026    | 0.69 | F | F6 |
| FBgn0052029 | R.IKDTVAEQIR.A                              | 628.85  | 2 | 33  | 0.041    | 1.01 | F | F1 |
| FBgn0052029 | R.DYQQYQPQQAAYRPPAQAAPQPPRR.R               | 937.79  | 3 | 49  | 0.00062  | 0.66 | F | F1 |
| FBgn0052311 | R.AVHQVQQWLEALHDR.R                         | 625.66  | 3 | 36  | 0.015    | 1.32 | F | F5 |
| FBgn0053113 | R.LHPQVESLIYWR.D                            | 791.93  | 2 | 39  | 0.008    | 0.85 | F | F3 |
| FBgn0053113 | K.QSIDTHL DLVR.S                            | 669.85  | 2 | 53  | 0.00026  | 1.10 | F | F3 |
| FBgn0053113 | K.VQNIAGVAVAHINGFISELR.R                    | 1075.6  | 2 | 82  | 1.50E-07 | 1.31 | F | F1 |
| FBgn0053138 | K.HYGLHFQPDNSVIAR.E                         | 898.45  | 2 | 41  | 0.0055   | 0.89 | F | F5 |

|             |                                    |         |   |     |          |      |   |    |
|-------------|------------------------------------|---------|---|-----|----------|------|---|----|
| FBgn0053715 | K.FHALEHNFGQALQENR.A               | 651.65  | 3 | 40  | 0.0044   | 1.04 | F | F5 |
| FBgn0053715 | R.IGQFVTHLVQR.Y                    | 670.38  | 2 | 53  | 0.00023  | 1.20 | F | F2 |
| FBgn0053715 | K.EIHQWLSEAEQLLGTNLSGGR.D          | 840.77  | 3 | 59  | 9.10E-05 | 1.16 | F | F4 |
| FBgn0053715 | K.LAIENAVQATEALLNK.Q               | 894.52  | 2 | 67  | 7.70E-06 | 1.42 | F | F1 |
| FBgn0000053 | R.GTQRPGVIGGLGGFGGLFR.L            | 944.52  | 2 | 41  | 0.0041   | 0.89 | R | F3 |
| FBgn0000053 | K.SVAHVTHGLLNDILR.L                | 843.97  | 2 | 42  | 0.0027   | 0.90 | R | F5 |
| FBgn0000055 | K.TIDILINGAGILDDHQIER.T            | 1074.56 | 2 | 60  | 5.60E-05 | 0.94 | R | F2 |
| FBgn0000055 | K.TVDVLINGAGILDDHQIER.T            | 1060.56 | 2 | 99  | 6.70E-09 | 1.23 | R | F2 |
| FBgn0000064 | K.NTPEEIALATVQALR.R                | 834.46  | 2 | 54  | 0.00026  | 0.65 | R | F1 |
| FBgn0000064 | K.KNTPEEIALATVQALR.R               | 919.51  | 2 | 58  | 7.50E-05 | 0.68 | R | F1 |
| FBgn0000064 | K.GVVPLFGSEDEVTTQGLDDLAAR.C        | 1216.12 | 2 | 63  | 2.90E-05 | 0.73 | R | F1 |
| FBgn0000064 | R.IVPIVEPEVLPDGDHDLDR.A            | 1085.56 | 2 | 108 | 9.70E-10 | 0.88 | R | F2 |
| FBgn0000084 | R.TLHSAVVAETSGDYKR.A               | 909.46  | 2 | 43  | 0.0032   | 0.97 | R | F3 |
| FBgn0000100 | R.APARPGAIAPLHVIPAQNTGLGPEK.T      | 1336.76 | 2 | 66  | 2.30E-06 | 0.87 | R | F2 |
| FBgn0000116 | K.KTDKHPASNFGDVSTFGNVDPTNEYVISTR.V | 1141.54 | 3 | 46  | 0.00077  | 0.48 | R | F2 |
| FBgn0000116 | K.AVQQQLIDDHFLFK.E                 | 893.47  | 2 | 53  | 0.00034  | 1.08 | R | F1 |
| FBgn0000116 | K.TFLVWCNEEDHLR.I                  | 880.91  | 2 | 54  | 0.00011  | 0.96 | R | F3 |
| FBgn0000116 | R.LVTAVNEIEKR.V                    | 678.38  | 2 | 62  | 4.30E-05 | 0.85 | R | F1 |
| FBgn0000116 | K.TDKHPASNFGDVSTFGNVDPTNEYVISTR.V  | 1629.78 | 2 | 71  | 2.20E-06 | 0.23 | R | F2 |
| FBgn0000116 | R.GEHTAEGGVYDISNK.R                | 898.42  | 2 | 71  | 1.10E-06 | 0.82 | R | F1 |
| FBgn0000116 | R.LGFLTFCPTNLGTTIR.A               | 926.99  | 2 | 73  | 3.30E-06 | 1.30 | R | F1 |
| FBgn0000116 | K.HPASNFGDVSTFGNVDPTNEYVISTR.V     | 1433.67 | 2 | 87  | 4.70E-08 | 0.68 | R | F2 |
| FBgn0000116 | R.GEHTAEGGVYDISNK.R                | 973.45  | 2 | 94  | 1.20E-08 | 0.67 | R | F3 |
| FBgn0000165 | K.ALELLFQRPLEPAFTTR.D              | 1024.07 | 2 | 34  | 0.017    | 1.01 | R | F2 |
| FBgn0000165 | R.VLAAIDQGYVEDSSGNRIPLDEVR.G       | 887.79  | 3 | 65  | 1.70E-05 | 1.12 | R | F2 |
| FBgn0000258 | K.EPFFHGHNDYDQLVR.I                | 959.96  | 2 | 32  | 0.017    | 0.83 | R | F5 |
| FBgn0000258 | R.FVHSDNQHLVSPEALDFLDK.L           | 1201.08 | 2 | 50  | 0.00043  | 0.86 | R | F3 |
| FBgn0000261 | K.NFTQVHADFGFR.M                   | 667.32  | 2 | 65  | 1.20E-05 | 0.77 | R | F3 |
| FBgn0000261 | R.LVQNIAGHLNASQFLQER.A             | 1084.06 | 2 | 82  | 3.20E-07 | 0.60 | R | F3 |
| FBgn0000261 | R.GPILLQDVNFLDEMESHFDR.E           | 1144.56 | 2 | 110 | 5.20E-10 | 1.00 | R | F2 |
| FBgn0000313 | R.LDFSENGISSIENDAFHEIGHSLISLK.M    | 1019.51 | 3 | 27  | 0.12     | 1.21 | R | F2 |
| FBgn0000313 | K.LNLDNLHLEYNHIEVLPNSFK.Y          | 1352.2  | 2 | 32  | 0.032    | 0.91 | R | F2 |
| FBgn0000313 | K.MSHGYSGSALPAEPLR.H               | 857.92  | 2 | 32  | 0.037    | 1.13 | R | F3 |
| FBgn0000313 | K.RLDFSENGISSIENDAFHEIGHSLISLK.M   | 1071.54 | 3 | 35  | 0.017    | 1.12 | R | F4 |
| FBgn0000313 | R.HLDLGYNHITHIQHDSFR.G             | 750.04  | 3 | 45  | 0.0017   | 1.01 | R | F6 |
| FBgn0000313 | R.TFFDGNPIHTLR.E                   | 730.37  | 2 | 52  | 0.00041  | 1.40 | R | F3 |
| FBgn0000313 | R.IVDFSHNHLR.G                     | 640.33  | 2 | 53  | 0.0003   | 1.77 | R | F5 |
| FBgn0000313 | R.LHYFEYGCLDSLPHLR.S               | 1031.5  | 2 | 60  | 5.20E-05 | 1.95 | R | F5 |
| FBgn0000313 | K.ISGNHLTEIPDDAFTGLER.S            | 1064.03 | 2 | 74  | 2.30E-06 | 0.84 | R | F2 |
| FBgn0000313 | R.MLDLNNDLTNPVPLMTQALPHLR.R        | 1326.2  | 2 | 76  | 1.80E-06 | 1.22 | R | F2 |
| FBgn0000313 | K.LAVLDLSHNR.D                     | 590.33  | 2 | 77  | 8.90E-07 | 1.90 | R | F3 |
| FBgn0000313 | R.FNHLTSISQHTFFDLEALR.K            | 1159.58 | 2 | 104 | 2.20E-09 | 0.76 | R | F5 |

|             |                                    |         |   |     |          |      |   |    |
|-------------|------------------------------------|---------|---|-----|----------|------|---|----|
| FBgn0000318 | K.DPNTHLIFLPTLLR.W                 | 846.48  | 2 | 66  | 6.10E-06 | 0.66 | R | F2 |
| FBgn0000318 | R.KDPNTHLIFLPTLLR.W                | 931.54  | 2 | 71  | 1.10E-06 | 0.86 | R | F2 |
| FBgn0000319 | R.ISADTIFVTAPHEASGGIIGVNR.K        | 1184.13 | 2 | 63  | 2.40E-05 | 0.87 | R | F2 |
| FBgn0000557 | K.CLIDALDAILPPQRPDKPLR.L           | 829.46  | 3 | 53  | 0.00018  | 1.30 | R | F2 |
| FBgn0000559 | K.DLVFITHPDQR.E                    | 691.86  | 2 | 56  | 0.00017  | 1.11 | R | F3 |
| FBgn0000559 | R.NMSVIAHVDHGK.S                   | 696.34  | 2 | 71  | 4.60E-06 | 2.77 | R | F3 |
| FBgn0000579 | K.AVGHVNDTLGPELIK.A                | 823.95  | 2 | 28  | 0.094    | 0.83 | R | F1 |
| FBgn0000579 | K.VNQIGTVTESIAAHLAK.K              | 975.05  | 2 | 56  | 7.40E-05 | 1.17 | R | F1 |
| FBgn0000579 | K.MGSEVYHHLK.N                     | 645.82  | 2 | 58  | 6.90E-05 | 0.54 | R | F3 |
| FBgn0000579 | K.EALNLISDAIAK.A                   | 671.37  | 2 | 75  | 2.10E-06 | 0.90 | R | F1 |
| FBgn0000579 | R.AAVPSGASTGVHEALELR.D             | 903.97  | 2 | 111 | 6.00E-10 | 1.15 | R | F2 |
| FBgn0000639 | R.DREDTQTLIVPAVQELLPELYLDEEVIQVR.S | 1233    | 3 | 36  | 0.0048   | 0.20 | R | F2 |
| FBgn0000639 | R.TRIEEHLDLSNLVEQQVQGIQQEIVGR.Q    | 1101.57 | 3 | 57  | 7.50E-05 | 0.40 | R | F4 |
| FBgn0000667 | R.LASDLLEWIR.R                     | 629.35  | 2 | 47  | 0.0014   | 1.03 | R | F1 |
| FBgn0000667 | R.HRPDLIDYAK.L                     | 656.34  | 2 | 49  | 0.00068  | 0.96 | R | F3 |
| FBgn0000667 | R.VGWEQLLTSINR.N                   | 729.39  | 2 | 55  | 0.00027  | 0.79 | R | F1 |
| FBgn0000667 | R.VEQIAAIAQELNTLEYHDCVSVNAR.C      | 1443.23 | 2 | 65  | 1.80E-05 | 0.81 | R | F2 |
| FBgn0000667 | K.IHQAVQESMIFENR.Y                 | 873.94  | 2 | 80  | 5.10E-07 | 0.71 | R | F3 |
| FBgn0000667 | K.QHQIPGGLENPYTTLTANDMTR.K         | 1250.1  | 2 | 107 | 8.50E-10 | 0.69 | R | F2 |
| FBgn0001098 | R.ESNYHLLASVQQSIER.I               | 959.99  | 2 | 54  | 0.00021  | 0.42 | R | F3 |
| FBgn0001098 | K.DIVHSGLDYTMER.S                  | 789.37  | 2 | 55  | 9.10E-05 | 0.92 | R | F3 |
| FBgn0001098 | K.TFIVQGFVGLHTTR.Y                 | 894.98  | 2 | 70  | 7.10E-06 | 1.00 | R | F3 |
| FBgn0001098 | R.ESNYHLLSVQESLER.R                | 987.98  | 2 | 97  | 8.90E-09 | 1.01 | R | F3 |
| FBgn0001114 | K.TIANRPVNAFLGIR.Y                 | 793.96  | 2 | 32  | 0.025    | 1.08 | R | F3 |
| FBgn0001114 | R.FTNNQSPLELDPHFGEGIYLPNYR.V       | 1496.23 | 2 | 38  | 0.0066   | 0.98 | R | F2 |
| FBgn0001114 | R.DQVEQEREEQPEDDQGEYER.L           | 893.71  | 3 | 59  | 4.20E-06 | 1.00 | R | F2 |
| FBgn0001114 | K.LREEQEEQKLEER.Y                  | 1029.49 | 2 | 82  | 2.60E-07 | 2.37 | R | F3 |
| FBgn0001125 | K.SIVLLHACAHNPTGVDPTEQWR.E         | 886.12  | 3 | 29  | 0.064    | 0.87 | R | F4 |
| FBgn0001125 | R.EIYIPSPSWGNIHVAIFEHAGLPVNR.Y     | 1423.24 | 2 | 69  | 5.40E-06 | 0.99 | R | F4 |
| FBgn0001128 | R.DLFQANHFR.V                      | 595.29  | 2 | 36  | 0.013    | 1.63 | R | F4 |
| FBgn0001128 | K.GLEDKFPLFTAIHK.I                 | 871.47  | 2 | 39  | 0.0079   | 4.77 | R | F1 |
| FBgn0001128 | K.AEGGGIDLISHIIR.H                 | 797.44  | 2 | 92  | 3.30E-08 | 2.12 | R | F3 |
| FBgn0001145 | R.RPSSNCDPYSVVEAILR.T              | 1003    | 2 | 42  | 0.0043   | 1.69 | R | F3 |
| FBgn0001145 | K.HETSSINDFSAGVANR.G               | 873.91  | 2 | 90  | 3.80E-08 | 1.02 | R | F3 |
| FBgn0001149 | K.LLNLQAGEHLKPEFLK.I               | 993.08  | 2 | 30  | 0.0059   | 0.84 | R | F1 |
| FBgn0001196 | R.AGLQFPVGR.I                      | 495.28  | 2 | 32  | 0.028    | 1.16 | R | F1 |
| FBgn0001196 | K.LLSGVTIAQGGVLPNIQAVLLPK.K        | 795.82  | 3 | 41  | 8.80E-05 | 1.04 | R | F1 |
| FBgn0001208 | R.EYNHVFPLLDNCGFRE                 | 1011.49 | 2 | 52  | 0.00029  | 1.26 | R | F3 |
| FBgn0001208 | R.FANQILSYGSELDADHPGFTDPEYR.K      | 962.11  | 3 | 69  | 2.90E-06 | 0.92 | R | F2 |
| FBgn0001218 | K.KVTHAVVTVPAYFNDAQR.Q             | 1050.55 | 2 | 35  | 0.022    | 1.16 | R | F2 |
| FBgn0001218 | K.VTHAVVTVPAYFNDAQR.Q              | 965.5   | 2 | 50  | 0.00064  | 0.97 | R | F2 |
| FBgn0001218 | K.DVHEIVLVGGSTR.I                  | 712.38  | 2 | 61  | 4.90E-05 | 0.58 | R | F3 |

|             |                                |         |   |     |          |      |   |    |
|-------------|--------------------------------|---------|---|-----|----------|------|---|----|
| FBgn0001219 | K.HWPFEVVSADGKPK.I             | 866.46  | 2 | 24  | 0.13     | 0.74 | R | F1 |
| FBgn0001219 | R.LVTHFVQEFK.R                 | 669.37  | 2 | 26  | 0.089    | 0.86 | R | F1 |
| FBgn0001219 | R.TTPSYVAFTDTER.L              | 766.87  | 2 | 32  | 0.017    | 1.35 | R | F1 |
| FBgn0001219 | R.ARFEELNADLFR.S               | 761.89  | 2 | 35  | 0.016    | 0.87 | R | F3 |
| FBgn0001219 | R.FEELNADLFR.S                 | 649.83  | 2 | 36  | 0.0081   | 1.09 | R | F1 |
| FBgn0001219 | K.STAGDTHLGGEDFDNR.L           | 867.38  | 2 | 66  | 2.80E-06 | 1.11 | R | F3 |
| FBgn0001219 | K.SVIHDIVLVGGSTR.I             | 747.92  | 2 | 74  | 2.30E-06 | 1.32 | R | F3 |
| FBgn0001219 | K.WLDANQLADKEEYHR.Q            | 1050.99 | 2 | 105 | 8.00E-10 | 0.89 | R | F3 |
| FBgn0001233 | K.KQLEINPDHPIVETLR.Q           | 993.54  | 2 | 54  | 0.0002   | 0.93 | R | F2 |
| FBgn0001233 | K.QLEINPDHPIVETLR.Q            | 908.49  | 2 | 72  | 4.50E-06 | 0.92 | R | F2 |
| FBgn0001233 | R.FHTSASGDDFCSLADYVSR.M        | 1088.97 | 2 | 106 | 2.00E-10 | 1.03 | R | F3 |
| FBgn0001263 | K.NNHVTTGCVITHVYPEGQVAADKR.L   | 1375.67 | 2 | 53  | 0.00019  | 1.79 | R | F4 |
| FBgn0001402 | R.QIVINEAAPGQDLLTLLHGVQFR.A    | 1287.72 | 2 | 73  | 7.20E-07 | 1.45 | R | F2 |
| FBgn0001402 | R.SDFMTVLSDLQHILIR.A           | 965.52  | 2 | 85  | 1.90E-07 | 1.02 | R | F2 |
| FBgn0001624 | K.RGDQLLSVNNVNLTHATHEEAAQALK.T | 1460.26 | 2 | 47  | 0.001    | 0.85 | R | F4 |
| FBgn0001624 | K.HGDILHVTNASDDEWWQAR.R        | 1148.04 | 2 | 66  | 5.60E-06 | 0.82 | R | F5 |
| FBgn0001942 | R.ILESGCHVVVGTPGR.V            | 811.92  | 2 | 61  | 4.90E-05 | 1.44 | R | F3 |
| FBgn0002526 | R.CSCPPGYSGHSCEDCAPGYR.D       | 1261.47 | 2 | 38  | 6.00E-05 | 1.25 | R | F3 |
| FBgn0002526 | R.ILNDGEDHVVTVQHTQGELR.L       | 1151.58 | 2 | 67  | 1.10E-05 | 0.85 | R | F4 |
| FBgn0002526 | K.LNELAEDIEEQHR.V              | 883.42  | 2 | 80  | 4.20E-07 | 0.92 | R | F3 |
| FBgn0002528 | R.KGEGEAHALCTSEYSDISPLR.D      | 1202.57 | 2 | 59  | 4.30E-05 | 1.19 | R | F2 |
| FBgn0002564 | K.YDFPLDISEPHNAFPDR.L          | 1039.49 | 2 | 68  | 3.70E-06 | 0.52 | R | F3 |
| FBgn0002565 | K.TIVSHYWHLMETYPEYHKK.D        | 866.44  | 3 | 31  | 0.04     | 0.21 | R | F5 |
| FBgn0002565 | K.TIVSHYWHLMETYPEYHKK.K        | 1209.55 | 2 | 33  | 0.013    | 0.30 | R | F5 |
| FBgn0002565 | R.TYYGVPQWHR.E                 | 674.83  | 2 | 38  | 0.0075   | 0.47 | R | F4 |
| FBgn0002565 | R.LSHDLGEVPAFNMYVPTESGYASNLR.T | 1456.72 | 2 | 39  | 0.0062   | 0.24 | R | F2 |
| FBgn0002565 | K.YDEHGHEIPLEHNYQNFFELEHFK.V   | 1052.81 | 3 | 48  | 0.00025  | 0.65 | R | F6 |
| FBgn0002565 | K.VHLEAGVNHK.R                 | 650.86  | 2 | 52  | 0.00055  | 0.53 | R | F3 |
| FBgn0002565 | K.HDYDFVHNFK.F                 | 784.85  | 2 | 62  | 8.40E-06 | 0.63 | R | F3 |
| FBgn0002579 | R.KREELSNILTQLR.K              | 842.47  | 2 | 56  | 0.00015  | 0.85 | R | F3 |
| FBgn0002719 | R.ATGDLYDEFIDFMHACVR.R         | 1166.01 | 2 | 76  | 2.30E-07 | 1.11 | R | F2 |
| FBgn0002719 | K.LHFAQLHEPIDTLAEAVR.K         | 1051.56 | 2 | 81  | 4.50E-07 | 0.99 | R | F5 |
| FBgn0002741 | R.AGVLGQMEEFR.D                | 641.32  | 2 | 24  | 0.21     | 0.79 | R | F1 |
| FBgn0002741 | K.AKLEQTLDEEDSLER.E            | 965.99  | 2 | 27  | 0.13     | 0.97 | R | F3 |
| FBgn0002741 | K.VKPLLNVSRI                   | 555.34  | 2 | 28  | 0.028    | 0.78 | R | F1 |
| FBgn0002741 | R.AGVLGQMEEFRDER.L             | 839.9   | 2 | 28  | 0.057    | 0.89 | R | F3 |
| FBgn0002741 | K.DIQTALEEEQR.A                | 688.84  | 2 | 30  | 0.037    | 0.63 | R | F1 |
| FBgn0002741 | K.KAEELHAAEVK.V                | 680.38  | 2 | 31  | 0.029    | 1.08 | R | F1 |
| FBgn0002741 | R.LSTEVEDLQLEVDR.A             | 845.93  | 2 | 32  | 0.025    | 1.43 | R | F1 |
| FBgn0002741 | K.LSIENSLLR.Q                  | 602.84  | 2 | 37  | 0.01     | 0.79 | R | F1 |
| FBgn0002741 | R.ATSVRPQFDGLAFPPR.F           | 900.98  | 2 | 38  | 0.014    | 1.06 | R | F3 |
| FBgn0002741 | K.LEQTLDEEDSLER.E              | 866.42  | 2 | 39  | 0.0071   | 1.50 | R | F1 |



|             |                                 |         |   |     |          |      |   |    |
|-------------|---------------------------------|---------|---|-----|----------|------|---|----|
| FBgn0002741 | K.LQQFFNHMHFVLEQEYYKR.E         | 856.75  | 3 | 42  | 0.002    | 0.28 | R | F5 |
| FBgn0002741 | K.QPGVVDAHLVMHQLTCNGVLEGIR.I    | 895.8   | 3 | 44  | 0.0021   | 1.61 | R | F4 |
| FBgn0002741 | R.RANALQNELEESR.T               | 786.4   | 2 | 44  | 0.0024   | 0.96 | R | F4 |
| FBgn0002741 | K.LLIEIFADHAGQSGGGEQAK.G        | 1063.03 | 2 | 45  | 0.0015   | 1.05 | R | F1 |
| FBgn0002741 | R.KAQQELEEAEER.A                | 772.37  | 2 | 51  | 0.00033  | 0.95 | R | F1 |
| FBgn0002741 | K.LTQEAVADLER.N                 | 643.83  | 2 | 58  | 0.00012  | 0.93 | R | F1 |
| FBgn0002741 | K.LKVDDLAAELDASQK.E             | 871.45  | 2 | 59  | 9.50E-05 | 0.87 | R | F1 |
| FBgn0002741 | R.NLEHDLNLRREQVEEEAEGK.A        | 1226.05 | 2 | 59  | 2.40E-05 | 1.08 | R | F3 |
| FBgn0002741 | K.GAYEEGQEQLAVR.R               | 810.88  | 2 | 62  | 1.90E-05 | 0.98 | R | F1 |
| FBgn0002741 | R.NLEHDLNLR.E                   | 640.82  | 2 | 68  | 6.40E-06 | 1.06 | R | F3 |
| FBgn0002741 | R.ANALQNELEESR.T                | 708.34  | 2 | 70  | 3.20E-06 | 0.91 | R | F1 |
| FBgn0002741 | K.AEDMSNLTYLNDASVLHNL.R.Q       | 1161.07 | 2 | 74  | 1.70E-06 | 0.45 | R | F2 |
| FBgn0002741 | K.RKLESELQTLHSDLDELLNEAK.N      | 1354.2  | 2 | 74  | 1.90E-06 | 0.89 | R | F3 |
| FBgn0002741 | R.KLESELQTLHSDLDELLNEAK.N       | 1276.15 | 2 | 75  | 1.50E-06 | 0.91 | R | F1 |
| FBgn0002741 | R.RDLEEANIQUESTLANLR.K          | 1076.05 | 2 | 85  | 1.90E-07 | 0.83 | R | F5 |
| FBgn0002741 | R.DLEEANIQUESTLANLR.K           | 997.99  | 2 | 105 | 2.00E-09 | 0.77 | R | F3 |
| FBgn0002741 | K.KLEADINELEIALDHANK.A          | 1081.57 | 2 | 113 | 2.60E-10 | 0.94 | R | F1 |
| FBgn0002772 | K.LDEFLPIYSQVK.K                | 768.41  | 2 | 43  | 0.0031   | 0.79 | R | F1 |
| FBgn0002787 | K.TFEHVPSEIGAEAEVGVVEHLLR.D     | 907.12  | 3 | 56  | 0.00011  | 1.02 | R | F4 |
| FBgn0002787 | K.VIVHPLVLLSVVDHFNR.M           | 668.06  | 3 | 61  | 9.30E-06 | 0.31 | R | F4 |
| FBgn0002921 | R.RNPGGWLEQETYY.-               | 829.39  | 2 | 25  | 0.053    | 1.27 | R | F1 |
| FBgn0002921 | R.GAEFTHENPLETK.N               | 778.87  | 2 | 31  | 0.023    | 1.01 | R | F1 |
| FBgn0002921 | K.FNTDDINFPIDNLR.F              | 869.91  | 2 | 37  | 0.0041   | 1.42 | R | F1 |
| FBgn0002921 | K.GVVISCGDHTVMGR.I              | 765.37  | 2 | 78  | 6.30E-07 | 1.29 | R | F3 |
| FBgn0002921 | K.YQVSIHETEDTNDPR.Y             | 923.42  | 2 | 81  | 1.50E-07 | 1.01 | R | F3 |
| FBgn0002938 | R.ADVWALGITTIELADGKPPFADMHPTR.A | 1004.85 | 3 | 49  | 0.00055  | 0.54 | R | F2 |
| FBgn0002938 | K.IQHYDEEHQVSIEEYR.T            | 1123.5  | 2 | 103 | 1.00E-09 | 1.52 | R | F5 |
| FBgn0002968 | K.ISWIHNGKPIEQSTPNPR.R          | 1079.56 | 2 | 75  | 2.00E-06 | 1.05 | R | F3 |
| FBgn0003071 | R.IIEAIDAISSTAYSHQR.T           | 960.5   | 2 | 31  | 0.05     | 0.78 | R | F3 |
| FBgn0003074 | K.AETHALLPYDQYLHR.F             | 624.65  | 3 | 53  | 0.00024  | 1.09 | R | F5 |
| FBgn0003074 | K.GLHSHFVSNIDGTHLAEVLK.K        | 1129.59 | 2 | 63  | 2.70E-05 | 1.17 | R | F5 |
| FBgn0003075 | K.SVVLMSHLGRPDGNK.N             | 847.44  | 2 | 33  | 0.027    | 0.74 | R | F3 |
| FBgn0003075 | K.LGDVYVNDAFGTAHR.A             | 838.91  | 2 | 84  | 2.10E-07 | 1.07 | R | F3 |
| FBgn0003149 | R.LAADFNQYR.H                   | 571.79  | 2 | 30  | 0.03     | 0.82 | R | F1 |
| FBgn0003149 | R.LHELELELR.R                   | 597.33  | 2 | 33  | 0.025    | 0.92 | R | F3 |
| FBgn0003149 | K.SRLDETHLYETSQR.D              | 933.48  | 2 | 36  | 0.017    | 0.43 | R | F3 |
| FBgn0003149 | R.RLENERDELTAAYK.E              | 896.45  | 2 | 38  | 0.0099   | 0.89 | R | F3 |
| FBgn0003149 | R.RLHELELELR.R                  | 675.38  | 2 | 39  | 0.0049   | 0.77 | R | F6 |
| FBgn0003149 | R.LAGLNGELEEV.R.S               | 672.86  | 2 | 45  | 0.0013   | 0.73 | R | F1 |
| FBgn0003149 | R.LEEAEGGAEHQFEANRK.R           | 999.96  | 2 | 60  | 2.60E-05 | 0.82 | R | F3 |
| FBgn0003149 | K.NLILLQDALDK.S                 | 670.38  | 2 | 73  | 2.20E-06 | 1.39 | R | F1 |
| FBgn0003149 | K.KQSLQTELQAHYEDVQR.Q           | 1135.58 | 2 | 81  | 4.40E-07 | 0.87 | R | F2 |

|             |                                          |         |   |     |          |      |   |    |
|-------------|------------------------------------------|---------|---|-----|----------|------|---|----|
| FBgn0003149 | R.SLLESSLHQVEIELDSVR.N                   | 1048.55 | 2 | 95  | 1.70E-08 | 0.86 | R | F2 |
| FBgn0003149 | K.QSLQLTELQAHYEDVQR.Q                    | 1050.52 | 2 | 101 | 4.30E-09 | 0.78 | R | F3 |
| FBgn0003149 | R.LEEAEGGAEHQFEANR.K                     | 914.91  | 2 | 105 | 5.40E-10 | 0.81 | R | F3 |
| FBgn0003162 | K.TREEFLNLVNSK.-                         | 767.4   | 2 | 55  | 0.00021  | 0.71 | R | F1 |
| FBgn0003162 | R.LLLGGLGENPDR.Q                         | 648.36  | 2 | 67  | 1.20E-05 | 1.13 | R | F1 |
| FBgn0003178 | R.LQFDSPVPHVR.L                          | 670.36  | 2 | 32  | 0.041    | 0.83 | R | F3 |
| FBgn0003178 | R.GAGTIDASHAAAIAAVEAATK.A                | 990.51  | 2 | 38  | 0.01     | 0.98 | R | F1 |
| FBgn0003178 | K.IENQQGMHNLDEIIEAGDGIMVAR.G             | 1348.15 | 2 | 76  | 9.30E-07 | 0.86 | R | F2 |
| FBgn0003217 | K.ELGQTALHIAAEQNR.R                      | 846.94  | 2 | 58  | 0.00011  | 0.86 | R | F3 |
| FBgn0003217 | K.LGQIEIESQCDELEHVR.N                    | 984.48  | 2 | 61  | 4.30E-05 | 1.85 | R | F3 |
| FBgn0003218 | R.VVSWLSQHNFPHGLISFADGLSTDPLGHK.T        | 1081.88 | 3 | 51  | 0.00032  | 0.79 | R | F4 |
| FBgn0003261 | R.YREEQEITVR.G                           | 682.85  | 2 | 29  | 0.069    | 1.03 | R | F3 |
| FBgn0003261 | K.YVINFDYPQNSEDIYHR.I                    | 1108.01 | 2 | 42  | 0.0014   | 0.76 | R | F3 |
| FBgn0003279 | R.RGPLVVYDKDEGLR.K                       | 850.96  | 2 | 30  | 0.065    | 0.90 | R | F3 |
| FBgn0003279 | K.APIRPDVVNEVHQLLR.R                     | 949.54  | 2 | 44  | 0.0014   | 0.87 | R | F5 |
| FBgn0003279 | R.YALVSAIAASGVPALVQSK.G                  | 965.05  | 2 | 90  | 3.40E-08 | 1.17 | R | F1 |
| FBgn0003392 | K.AMLQMIQQLQSDFER.T                      | 941.97  | 2 | 40  | 0.0027   | 0.80 | R | F1 |
| FBgn0003392 | R.KFFLSHPSYR.H                           | 683.35  | 2 | 59  | 7.40E-05 | 0.74 | R | F3 |
| FBgn0003432 | R.QVQQHHGGSIGGAYVPPSLTHVYAQGDISPVEQIFK.N | 1393.72 | 3 | 28  | 0.041    | 0.76 | R | F4 |
| FBgn0003432 | R.GSTEIYEGQTAHFEAQVAPVHDPNLR.I           | 971.14  | 3 | 29  | 0.047    | 0.56 | R | F4 |
| FBgn0003432 | K.VEFHNGKPLSTGHR.F                       | 927.98  | 2 | 33  | 0.03     | 0.36 | R | F5 |
| FBgn0003432 | R.TEVDGAPISPPHFTAELR.G                   | 991.52  | 2 | 34  | 0.024    | 0.89 | R | F2 |
| FBgn0003432 | R.AILSVVQRPSIEQSSQNPNSLQYINQLEDYSR.Y     | 1241.29 | 3 | 36  | 0.0083   | 0.42 | R | F2 |
| FBgn0003432 | R.QRPVFTQPLQNIDR.I                       | 877.47  | 2 | 36  | 0.016    | 0.76 | R | F3 |
| FBgn0003432 | R.IHQLEKPLAPRPTPEPER.L                   | 1048.07 | 2 | 41  | 0.0034   | 0.89 | R | F4 |
| FBgn0003432 | R.RSGYEQDSQLSQELDR.N                     | 978.46  | 2 | 42  | 0.0018   | 0.74 | R | F3 |
| FBgn0003432 | R.SSIHETQHEEALTK.I                       | 903.95  | 2 | 43  | 0.0026   | 0.62 | R | F3 |
| FBgn0003432 | R.RSEFVDEVVNIRPR.F                       | 586.65  | 3 | 44  | 0.0022   | 0.85 | R | F5 |
| FBgn0003432 | K.VSGKPGIVYDSQLPAHMQSIDR.I               | 1241.64 | 2 | 48  | 0.00096  | 0.72 | R | F2 |
| FBgn0003432 | R.SEFVDEVVNIRPR.F                        | 801.41  | 2 | 54  | 0.00034  | 0.72 | R | F3 |
| FBgn0003432 | R.SGEQIVTVTQNEAGLEQIHYLEDR.S             | 1387.7  | 2 | 54  | 0.00021  | 0.63 | R | F2 |
| FBgn0003432 | K.LHEGQHVLLEAQVEPR.A                     | 950.51  | 2 | 58  | 0.0001   | 0.97 | R | F5 |
| FBgn0003432 | R.LFEKPIFTQLLTGPSELWEGTHAHFEAR.V         | 1113.57 | 3 | 62  | 2.50E-05 | 0.70 | R | F4 |
| FBgn0003432 | R.HWLQAESLHPDSLPR.I                      | 914.46  | 2 | 65  | 1.90E-05 | 1.12 | R | F5 |
| FBgn0003432 | R.HHQEEDITIMQAPQFTR.G                    | 1063.51 | 2 | 81  | 3.30E-07 | 0.89 | R | F5 |
| FBgn0003432 | K.SIYLESQHETALPR.L                       | 843.43  | 2 | 85  | 2.30E-07 | 1.11 | R | F3 |
| FBgn0003470 | K.IAALQTVADQLIAQNHYASNLVDEK.R            | 937.16  | 3 | 46  | 0.0014   | 0.81 | R | F1 |
| FBgn0003470 | K.RKEELNEAWQR.L                          | 771.89  | 2 | 50  | 0.00056  | 0.88 | R | F3 |
| FBgn0003470 | K.LIDGQHYAADDVAQR.R                      | 858.93  | 2 | 52  | 0.0003   | 1.01 | R | F3 |
| FBgn0003470 | K.HANLFHQWLTETR.T                        | 847.92  | 2 | 54  | 0.00022  | 0.74 | R | F5 |
| FBgn0003470 | R.LNEALTLHQFFR.D                         | 765.91  | 2 | 57  | 0.00016  | 0.73 | R | F3 |
| FBgn0003470 | R.KQHLLDSLQVQLFR.D                       | 969.04  | 2 | 62  | 2.40E-05 | 0.97 | R | F3 |

|             |                               |         |   |    |          |      |   |    |
|-------------|-------------------------------|---------|---|----|----------|------|---|----|
| FBgn0003470 | K.KHDAFETDFTAHK.D             | 836.89  | 2 | 63 | 1.10E-05 | 0.80 | R | F2 |
| FBgn0003470 | K.FIESGHFDADNIR.N             | 781.87  | 2 | 69 | 4.40E-06 | 1.13 | R | F3 |
| FBgn0003470 | K.HQAFEAEELAAADR.I            | 794.39  | 2 | 69 | 4.40E-06 | 0.98 | R | F3 |
| FBgn0003470 | K.QHLLDSLQVQQLFR.D            | 883.99  | 2 | 83 | 2.40E-07 | 0.80 | R | F3 |
| FBgn0003470 | K.RLEAELGSHEPAIQAVQEAGEK.L    | 1223.62 | 2 | 85 | 1.70E-07 | 0.97 | R | F3 |
| FBgn0003470 | K.DKETFVTADEFGQDLEHVEVLQR.K   | 1395.18 | 2 | 86 | 1.20E-07 | 1.07 | R | F2 |
| FBgn0003470 | K.KHQLVEADIVAHEDR.I           | 922.47  | 2 | 89 | 8.60E-08 | 1.03 | R | F5 |
| FBgn0003470 | K.KIEELGALLEEHLILDNR.Y        | 1095.1  | 2 | 89 | 3.70E-08 | 1.08 | R | F2 |
| FBgn0003471 | K.HRPDLVQFEK.L                | 676.85  | 2 | 30 | 0.058    | 1.06 | R | F4 |
| FBgn0003471 | R.EQEVLHAWDNLQAMCDAR.K        | 1116.01 | 2 | 39 | 0.0018   | 0.75 | R | F3 |
| FBgn0003471 | K.KNQSLATEIDNHEPR.I           | 918.45  | 2 | 40 | 0.0048   | 0.88 | R | F3 |
| FBgn0003471 | R.QLLHVEHPNSDEILER.Q          | 986     | 2 | 49 | 0.00091  | 0.95 | R | F5 |
| FBgn0003471 | K.HSLVEADINILGER.V            | 805.94  | 2 | 55 | 0.00023  | 1.09 | R | F3 |
| FBgn0003471 | K.KFEALISDLTQK.W              | 764.44  | 2 | 57 | 4.70E-05 | 0.76 | R | F1 |
| FBgn0003471 | K.KHEAIETDIFAYEER.V           | 970.98  | 2 | 58 | 7.20E-05 | 1.14 | R | F3 |
| FBgn0003471 | K.HENLEQSVEDYANTIR.Q          | 981.97  | 2 | 61 | 1.90E-05 | 0.88 | R | F3 |
| FBgn0003471 | K.KHENLEQSVEDYANTIR.Q         | 1065.51 | 2 | 69 | 5.50E-06 | 0.80 | R | F3 |
| FBgn0003471 | R.EVVAGSQELGQDFDHVTLLSER.F    | 1236.11 | 2 | 69 | 7.50E-06 | 0.80 | R | F2 |
| FBgn0003471 | K.VGSELITEGHFGADR.I           | 815.4   | 2 | 82 | 3.00E-07 | 0.97 | R | F3 |
| FBgn0003721 | R.RIQLLEEDLER.S               | 728.39  | 2 | 37 | 0.013    | 0.96 | R | F3 |
| FBgn0003721 | K.KIQTVENELDQTQEALTLVTGK.L    | 865.14  | 3 | 42 | 0.0026   | 0.61 | R | F1 |
| FBgn0003721 | K.EVDREDDLLNVR.G              | 814.42  | 2 | 49 | 0.00074  | 1.01 | R | F3 |
| FBgn0003721 | K.IVELEEEELR.L                | 587.83  | 2 | 49 | 0.00048  | 0.60 | R | F1 |
| FBgn0003721 | K.LAMVEADLER.A                | 594.8   | 2 | 51 | 0.00058  | 0.76 | R | F1 |
| FBgn0003721 | K.ALQNAESEVAALNR.R            | 764.39  | 2 | 52 | 0.00045  | 0.83 | R | F1 |
| FBgn0003721 | R.IQLLEEDLER.S                | 650.35  | 2 | 62 | 4.90E-05 | 1.03 | R | F1 |
| FBgn0003721 | K.IVELEEEELR.V                | 586.32  | 2 | 68 | 1.40E-05 | 0.91 | R | F1 |
| FBgn0003721 | K.LSEASQAADER.S               | 717.82  | 2 | 70 | 1.80E-06 | 1.47 | R | F1 |
| FBgn0003721 | K.LSEASQAADER.I               | 717.82  | 2 | 70 | 1.80E-06 | 1.47 | R | F1 |
| FBgn0003721 | R.KLAMVEADLER.A               | 679.86  | 2 | 74 | 3.20E-06 | 1.11 | R | F1 |
| FBgn0003721 | R.REEAESEVAALNR.R             | 758.38  | 2 | 96 | 1.60E-08 | 0.82 | R | F3 |
| FBgn0003738 | K.DIGADWVILGHSER.R            | 805.41  | 2 | 61 | 4.10E-05 | 0.78 | R | F3 |
| FBgn0003738 | K.TATPDQAQEVHAFRLR.Q          | 864.94  | 2 | 70 | 4.90E-06 | 0.30 | R | F3 |
| FBgn0003884 | R.QLFHPEQLITGK.E              | 750.92  | 2 | 29 | 0.036    | 0.74 | R | F1 |
| FBgn0003884 | K.EIVDLVLDR.I                 | 557.31  | 2 | 54 | 0.00033  | 0.72 | R | F1 |
| FBgn0003884 | R.IHFPLVYAPVISAER.A           | 935.02  | 2 | 75 | 1.40E-06 | 0.96 | R | F1 |
| FBgn0003887 | K.LTTPTYGDLNHLVSLTMSGVTTCLR.F | 1396.71 | 2 | 92 | 3.40E-08 | 1.23 | R | F2 |
| FBgn0004117 | K.LAFVEDELEVAEDR.V            | 840.42  | 2 | 24 | 0.14     | 1.16 | R | F1 |
| FBgn0004117 | K.LLTATESEVATQNR.K            | 787.91  | 2 | 57 | 0.00014  | 0.85 | R | F1 |
| FBgn0004167 | R.IDSLAEHWQALEALVELR.R        | 1068.07 | 2 | 66 | 1.20E-05 | 1.17 | R | F2 |
| FBgn0004169 | K.EYITWR.K                    | 521.26  | 2 | 39 | 0.0035   | 0.84 | R | F1 |
| FBgn0004363 | K.DFVLHTAVNDGQEFSGSIFQR.T     | 1205.08 | 2 | 76 | 1.40E-06 | 0.84 | R | F2 |

|             |                                      |         |   |     |          |      |   |    |
|-------------|--------------------------------------|---------|---|-----|----------|------|---|----|
| FBgn0004397 | R.VEGASQLLEEASDMLR.S                 | 896.95  | 2 | 28  | 0.05     | 1.09 | R | F1 |
| FBgn0004397 | K.WLQHPEINDGGLGER.A                  | 883.44  | 2 | 38  | 0.0075   | 1.25 | R | F3 |
| FBgn0004507 | K.ARPEFMLPVNFYGR.V                   | 871.45  | 2 | 34  | 0.02     | 0.39 | R | F3 |
| FBgn0004507 | R.VFAMPYDNPIPGYNNNHVNTLR.L           | 1294.63 | 2 | 40  | 0.005    | 1.28 | R | F3 |
| FBgn0004507 | R.SCA YTNHTVLPALER.W                 | 951.96  | 2 | 47  | 0.00071  | 1.04 | R | F3 |
| FBgn0004507 | R.INMAHLSIVGSHAVNGVAAIHSQILK.D       | 922.18  | 3 | 62  | 1.10E-05 | 1.19 | R | F4 |
| FBgn0004507 | K.VAIQLNDTHPSLAIPELMR.I              | 1080.59 | 2 | 68  | 7.00E-06 | 0.90 | R | F2 |
| FBgn0004516 | K.SCAAVCGLGTDHCIVVPSDEHGK.M          | 1277.07 | 2 | 40  | 0.0018   | 2.56 | R | F2 |
| FBgn0004516 | R.ALPLQQLIEDCATTLK.Y                 | 949.51  | 2 | 58  | 0.00011  | 1.75 | R | F1 |
| FBgn0004551 | K.LSYWQLTHHLSCLGGGDEFK.G             | 1216.57 | 2 | 53  | 0.00014  | 0.74 | R | F3 |
| FBgn0004611 | R.STANGDVATGTGTGSAAGTAGHAPPLQQIR.Q   | 937.14  | 3 | 31  | 0.036    | 0.43 | R | F2 |
| FBgn0004624 | K.ICDPHLTAFEPEALGNLVEGIDFHK.F        | 1453.71 | 2 | 48  | 0.00075  | 1.57 | R | F2 |
| FBgn0004873 | K.KYPQSEPETEHQVIEIQTQQAPVPR.Q        | 1508.76 | 2 | 70  | 4.30E-06 | 0.85 | R | F2 |
| FBgn0004873 | K.YPQSEPETEHQVIEIQTQQAPVPR.Q         | 1423.7  | 2 | 74  | 1.70E-06 | 0.98 | R | F2 |
| FBgn0004873 | K.ISAGPQSHILEGVTWDEASR.L             | 1098.05 | 2 | 112 | 3.70E-10 | 0.75 | R | F2 |
| FBgn0004907 | K.SVTETGVELSNEER.N                   | 796.38  | 2 | 44  | 0.0015   | 0.92 | R | F1 |
| FBgn0004907 | R.YLAEVATGDAR.N                      | 604.3   | 2 | 48  | 0.00075  | 1.11 | R | F1 |
| FBgn0005384 | R.WQEPERPAFGDSEGGQSAGGNR.S           | 1216.04 | 2 | 30  | 0.013    | 0.84 | R | F3 |
| FBgn0005384 | K.HVINFDLPSDVEEYVHR.I                | 1056.02 | 2 | 57  | 9.30E-05 | 0.58 | R | F5 |
| FBgn0005533 | K.IAGYVTHLMGR.L                      | 630.33  | 2 | 70  | 7.20E-06 | 0.83 | R | F3 |
| FBgn0005634 | K.SLEEETVNHEGVLADMR.H                | 985.96  | 2 | 29  | 0.041    | 2.21 | R | F3 |
| FBgn0005634 | R.RAAETERDELAEEIANNANK.G             | 1167.58 | 2 | 30  | 0.046    | 0.81 | R | F4 |
| FBgn0005634 | K.IAHLGLSVTDMTR.A                    | 784.93  | 2 | 37  | 0.011    | 0.77 | R | F3 |
| FBgn0005634 | K.ALEAEVLQTEDLASSER.A                | 1008.52 | 2 | 43  | 0.0034   | 0.91 | R | F1 |
| FBgn0005634 | K.AKHEATITELEER.L                    | 805.91  | 2 | 68  | 8.10E-06 | 1.05 | R | F3 |
| FBgn0005634 | K.HSQELNSINDQLENLR.K                 | 976.48  | 2 | 75  | 1.80E-06 | 0.74 | R | F3 |
| FBgn0005664 | R.LLNNDLWQLDR.L                      | 721.38  | 2 | 36  | 0.017    | 0.65 | R | F1 |
| FBgn0005664 | R.RLLNNDLWQLDR.L                     | 799.43  | 2 | 36  | 0.015    | 0.70 | R | F3 |
| FBgn0005664 | R.FNSLEELQTR.L                       | 639.82  | 2 | 39  | 0.0083   | 1.12 | R | F1 |
| FBgn0005664 | R.LLDQQTLLLAQLPSIQATVVVSHPTLLATR.L   | 1683.98 | 2 | 70  | 2.50E-07 | 0.83 | R | F2 |
| FBgn0005664 | R.LTAQAIAEAQSLVEAQQASQLQLEAQRNR.E    | 1069.9  | 3 | 121 | 2.40E-11 | 1.06 | R | F2 |
| FBgn0005666 | R.RPSVQDLEDLINKPSTPLR.D              | 1134.63 | 2 | 28  | 0.066    | 1.18 | R | F3 |
| FBgn0005666 | K.AGFSDPDATEPHLAKPR.N                | 990.48  | 2 | 37  | 0.012    | 1.02 | R | F2 |
| FBgn0005666 | K.NEHGSFDASAHATVLDPRSPPK.G           | 1209.09 | 2 | 66  | 1.10E-05 | 0.75 | R | F4 |
| FBgn0005666 | R.KVESFLSPIDQFAK.E                   | 929.03  | 2 | 73  | 9.10E-07 | 0.84 | R | F1 |
| FBgn0005666 | R.YDILEEIGTGAFGVVHR.C                | 959.5   | 2 | 75  | 2.20E-06 | 0.77 | R | F3 |
| FBgn0005666 | K.FVPQPVEISQSVYDRYDILEEIGTGAFGVVHR.C | 1264.32 | 3 | 77  | 6.00E-07 | 0.63 | R | F4 |
| FBgn0005671 | K.RIPASILAEFYPR.D                    | 787.94  | 2 | 57  | 0.0001   | 1.02 | R | F3 |
| FBgn0005671 | K.HVLVILTDMSSYAEALR.E                | 980.52  | 2 | 89  | 7.70E-08 | 0.67 | R | F3 |
| FBgn0005671 | K.IPISFAAGLPHNEIAAQICR.Q             | 1110.59 | 2 | 89  | 6.70E-08 | 1.89 | R | F2 |
| FBgn0005776 | R.TVAAEHSAQDLEIHVVPTLQR.L            | 786.08  | 3 | 51  | 0.00049  | 0.85 | R | F4 |
| FBgn0010100 | K.VAVPSTVHCDHLIEAQIGGPK.D            | 1156.59 | 2 | 36  | 0.014    | 1.23 | R | F2 |

|             |                                     |         |   |     |          |      |   |    |
|-------------|-------------------------------------|---------|---|-----|----------|------|---|----|
| FBgn0010100 | K.KVAVPSTVHCDHLIEAQIGGPK.D          | 1241.65 | 2 | 47  | 0.00098  | 1.47 | R | F2 |
| FBgn0010100 | K.VLYSHLDDPANQDIVR.G                | 948.98  | 2 | 47  | 0.0012   | 0.81 | R | F2 |
| FBgn0010213 | K.HHQTYVNNLNAAEEQLEEK.S             | 1211.57 | 2 | 65  | 1.00E-05 | 0.54 | R | F4 |
| FBgn0010217 | K.VVDLLAPYAK.G                      | 586.84  | 2 | 27  | 0.13     | 0.95 | R | F1 |
| FBgn0010217 | R.TIAMDGTEGLVR.G                    | 652.83  | 2 | 49  | 0.00076  | 1.03 | R | F1 |
| FBgn0010217 | R.VALTGLTVAEYFR.D                   | 741.41  | 2 | 49  | 0.0006   | 0.50 | R | F1 |
| FBgn0010217 | R.IINVIGEPIDER.G                    | 705.39  | 2 | 63  | 2.30E-05 | 1.18 | R | F1 |
| FBgn0010217 | R.AIAELGIYPAVDPLDSTSR.I             | 1015.53 | 2 | 71  | 4.60E-06 | 0.95 | R | F1 |
| FBgn0010217 | R.IMDPNIIGQEHYNVAR.G                | 957.99  | 2 | 71  | 4.50E-06 | 0.46 | R | F3 |
| FBgn0010217 | R.FLSQPFQVAEVFTGHAGK.L              | 1024.03 | 2 | 78  | 9.30E-07 | 0.49 | R | F1 |
| FBgn0010288 | K.VIIHHFIALVNK.E                    | 687.9   | 2 | 48  | 0.00043  | 1.03 | R | F3 |
| FBgn0010288 | K.FTADHEALAQEGQTNAANHEK.V           | 1183.54 | 2 | 63  | 9.00E-06 | 1.02 | R | F2 |
| FBgn0010424 | K.TGSIPTMVADILR.L                   | 774.42  | 2 | 34  | 0.016    | 1.00 | R | F1 |
| FBgn0010424 | K.ILEELIEEVEDKSGR.L                 | 982.51  | 2 | 65  | 1.20E-05 | 1.25 | R | F1 |
| FBgn0010434 | K.RIDAENGSIHSTGILDPATGLIDTK.Y       | 938.5   | 3 | 35  | 0.014    | 0.81 | R | F2 |
| FBgn0010434 | K.NIDGVTHNVEEEVR.N                  | 826.9   | 2 | 54  | 0.00013  | 1.10 | R | F3 |
| FBgn0010434 | K.SPLFTTSATTGPHVESTR.V              | 965.98  | 2 | 83  | 2.80E-07 | 0.84 | R | F3 |
| FBgn0010551 | R.VLSRPDSLNLPLYLHK.Q                | 918.51  | 2 | 48  | 0.00059  | 0.60 | R | F2 |
| FBgn0010551 | R.LGGIQSDIYSEGLHVR.I                | 893.46  | 2 | 86  | 1.80E-07 | 0.90 | R | F3 |
| FBgn0011211 | K.TALAITIINQK.R                     | 692.89  | 2 | 27  | 0.13     | 0.93 | R | F1 |
| FBgn0011211 | R.VLSIGDGIAR.V                      | 521.8   | 2 | 43  | 0.0051   | 0.98 | R | F1 |
| FBgn0011211 | K.GIRPAINVGLSVSR.V                  | 740.93  | 2 | 48  | 0.00036  | 0.65 | R | F3 |
| FBgn0011211 | R.EVAFAAQFGSDLDAATQQLLR.G           | 1204.11 | 2 | 103 | 3.20E-09 | 0.26 | R | F1 |
| FBgn0011643 | K.GYGFGGAGCLSTDTGAHLNR.E            | 1055.48 | 2 | 92  | 1.20E-08 | 1.56 | R | F3 |
| FBgn0011693 | K.IIFPETSDETYR.I                    | 756.87  | 2 | 40  | 0.004    | 1.25 | R | F1 |
| FBgn0011693 | K.RVYPLEIKPQWTGK.E                  | 925.54  | 2 | 41  | 0.00091  | 1.03 | R | F1 |
| FBgn0011770 | K.AAGILADVAADNIQLLADLYHLQHLHGNVSK.T | 1124.28 | 3 | 54  | 6.20E-05 | 0.14 | R | F4 |
| FBgn0013334 | K.IITEENFWR.N                       | 626.83  | 2 | 25  | 0.14     | 0.96 | R | F1 |
| FBgn0013334 | K.IKEEILGLSQDRR.N                   | 820.96  | 2 | 40  | 0.0051   | 1.02 | R | F3 |
| FBgn0013334 | K.IKEEILGLSQDR.R                    | 742.9   | 2 | 45  | 0.002    | 0.77 | R | F1 |
| FBgn0013733 | K.HFQELGHDVVDHLAGTPDAQAVEIK.L       | 939.48  | 3 | 36  | 0.012    | 1.30 | R | F4 |
| FBgn0013733 | R.SLSASTPDSLSDNEGSHGGPSGR.Y         | 1174.03 | 2 | 38  | 0.0025   | 5.40 | R | F3 |
| FBgn0013733 | R.VQALFDWLDHAEHK.L                  | 896.94  | 2 | 38  | 0.0077   | 1.06 | R | F2 |
| FBgn0013733 | R.DGHNLLSLEVLSGEHLPR.E              | 714.39  | 3 | 48  | 0.00085  | 0.71 | R | F5 |
| FBgn0013733 | R.LPHVEPLSSAESPIR.Q                 | 838.96  | 2 | 49  | 0.00081  | 1.07 | R | F2 |
| FBgn0013733 | K.VLANDIQAHQNSVDTLNDAGR.Q           | 1147.07 | 2 | 58  | 7.40E-05 | 0.85 | R | F2 |
| FBgn0013733 | R.AAGGDADHLTSEVDGLADR.M             | 956.44  | 2 | 62  | 1.40E-05 | 0.88 | R | F2 |
| FBgn0013733 | K.LLEASLAGLEDNEHVISELENELAR.H       | 1403.73 | 2 | 63  | 2.50E-05 | 0.97 | R | F2 |
| FBgn0013733 | R.HEIDQTKPEVEQVR.R                  | 896.45  | 2 | 64  | 2.60E-05 | 0.83 | R | F3 |
| FBgn0013733 | R.KPANDSDKIHDEVKR.L                 | 960.48  | 2 | 74  | 2.30E-06 | 1.25 | R | F2 |
| FBgn0014002 | K.YRDDILFVTISSDEEDHTR.I             | 786.04  | 3 | 40  | 0.0027   | 1.07 | R | F6 |
| FBgn0014027 | K.LVTALCNEHQIPLIR.V                 | 910     | 2 | 71  | 3.30E-06 | 1.79 | R | F3 |

|             |                                     |         |   |     |          |      |   |    |
|-------------|-------------------------------------|---------|---|-----|----------|------|---|----|
| FBgn0014189 | R.CVALSQQLLTEQNFPAGIHR.G            | 1155.1  | 2 | 69  | 7.90E-06 | 0.93 | R | F3 |
| FBgn0014863 | K.GFGYGHAPTLVSTSGESTIQFPDGRPLAGPK.T | 1614.8  | 2 | 57  | 9.80E-05 | 0.86 | R | F2 |
| FBgn0014863 | K.GYGYGQGGGALQSDCYAHDDGAPQIR.A      | 1378.11 | 2 | 86  | 2.50E-08 | 0.78 | R | F2 |
| FBgn0014869 | K.DAGLEFDVAHTSVLTR.A                | 886.95  | 2 | 52  | 0.0004   | 0.81 | R | F3 |
| FBgn0015221 | R.ATHATDAERDPELAHYFEENFLGK.Q        | 1423.16 | 2 | 80  | 2.90E-07 | 1.71 | R | F4 |
| FBgn0015221 | K.RGTLEVDELHSLALALDTEK.Q            | 1147.59 | 2 | 84  | 2.20E-07 | 3.99 | R | F3 |
| FBgn0015324 | R.LDLISQQLVPEIR.N                   | 784.97  | 2 | 26  | 0.02     | 0.84 | R | F1 |
| FBgn0015390 | R.LTHSDPEDEEPADDVDER.S              | 1055.95 | 2 | 34  | 0.0017   | 1.35 | R | F2 |
| FBgn0015390 | K.SESRPESVIASGEPVPR.E               | 919.97  | 2 | 38  | 0.0087   | 1.24 | R | F3 |
| FBgn0015390 | R.ESHTDTPESSPKPTSPFPR.V             | 1091.01 | 2 | 50  | 0.00035  | 1.20 | R | F2 |
| FBgn0015390 | R.DAHVYPQIGHFFGNVPDRK.G             | 1141.07 | 2 | 59  | 7.70E-05 | 0.56 | R | F5 |
| FBgn0015390 | K.ATEHVSEHVTTTGESSTETSQEK.S         | 1280.08 | 2 | 77  | 3.10E-07 | 1.18 | R | F2 |
| FBgn0015567 | K.NAVLFEAINLIHSDSEPNLLVR.A          | 1310.22 | 2 | 99  | 3.20E-09 | 0.68 | R | F2 |
| FBgn0015623 | R.LHSIQNRPPFDAK.N                   | 867.95  | 2 | 25  | 0.19     | 1.00 | R | F3 |
| FBgn0015623 | R.TALTHYLEITAIPR.T                  | 820.96  | 2 | 94  | 1.90E-08 | 1.41 | R | F3 |
| FBgn0016120 | K.LVPVAGLVDSFQK.Q                   | 728.91  | 2 | 56  | 0.00012  | 1.47 | R | F1 |
| FBgn0016120 | K.SKEQLEAEAQGHH.-                   | 774.36  | 2 | 64  | 1.40E-05 | 1.20 | R | F2 |
| FBgn0016724 | K.AFQLALDYPPR.A                     | 691.86  | 2 | 34  | 0.023    | 1.02 | R | F1 |
| FBgn0016724 | R.KVYLDGLFR.T                       | 597.83  | 2 | 42  | 0.0026   | 0.73 | R | F1 |
| FBgn0016724 | K.EKPIIISSIAELLGDRK.G               | 1004.58 | 2 | 59  | 2.00E-05 | 1.34 | R | F1 |
| FBgn0016724 | K.LNGNLVEYPQHLSGLHAWR.R             | 1123.58 | 2 | 61  | 4.60E-05 | 0.75 | R | F5 |
| FBgn0016724 | K.LDAVEHTTLIIVDLR.D                 | 875.5   | 2 | 67  | 5.30E-06 | 0.80 | R | F6 |
| FBgn0016724 | K.EKPIIISSIAELLGDRK.K               | 919.53  | 2 | 113 | 1.20E-10 | 1.21 | R | F1 |
| FBgn0016976 | R.AEEHATEPPFLAAPQR.D                | 903.45  | 2 | 31  | 0.051    | 1.09 | R | F2 |
| FBgn0016976 | R.HDIIPVATEEWIR.L                   | 810.93  | 2 | 35  | 0.024    | 1.04 | R | F3 |
| FBgn0017539 | R.GVLALNLEDGTLHR.F                  | 775.42  | 2 | 70  | 5.80E-06 | 1.18 | R | F3 |
| FBgn0017539 | K.DVIVPGLYAAGEAASSSVHGANR.L         | 1142.08 | 2 | 89  | 8.10E-08 | 0.27 | R | F3 |
| FBgn0017539 | K.QYPVVDHAYDAIVVGAGGAGLR.A          | 1135.59 | 2 | 155 | 1.80E-14 | 1.08 | R | F2 |
| FBgn0017645 | K.FIGPVVMEVPHFASLR.G                | 920.99  | 2 | 42  | 0.0041   | 0.64 | R | F3 |
| FBgn0017645 | K.AGFTPLHLSSQEGHAEISNLLIEHK.A       | 940.17  | 3 | 45  | 0.0015   | 0.80 | R | F4 |
| FBgn0019624 | R.RVNDIALAIR.W                      | 591.85  | 2 | 68  | 5.70E-06 | 1.33 | R | F3 |
| FBgn0019652 | R.HQIQTQILQWEENLER.L                | 1054.04 | 2 | 70  | 6.30E-06 | 1.50 | R | F3 |
| FBgn0019960 | K.LVDHIGNVKDELYR.H                  | 880.98  | 2 | 63  | 3.20E-05 | 1.52 | R | F3 |
| FBgn0020235 | K.IANEVLQTGYDYTEGK.I                | 942.96  | 2 | 34  | 0.015    | 0.84 | R | F1 |
| FBgn0020238 | R.YLAEFATGSDR.K                     | 636.3   | 2 | 51  | 0.00024  | 0.99 | R | F1 |
| FBgn0020238 | R.YLAEFATGSDRK.D                    | 721.35  | 2 | 59  | 4.80E-05 | 0.76 | R | F1 |
| FBgn0020238 | K.AASDIAMNDLPPTHPIR.L               | 930.97  | 2 | 61  | 5.60E-05 | 1.04 | R | F3 |
| FBgn0020240 | R.VIAQQQEESHFTVEEYYQTR.F            | 1292.59 | 2 | 34  | 0.0077   | 0.68 | R | F2 |
| FBgn0020254 | K.IGITNHEEYGLVR.E                   | 773.41  | 2 | 33  | 0.039    | 1.07 | R | F3 |
| FBgn0020254 | R.RPLTSSDDGQWSEGLISAAR.L            | 1094.54 | 2 | 44  | 0.0027   | 0.90 | R | F3 |
| FBgn0020254 | R.VGEATTHVLSTIAEEVPEENR.D           | 1163.58 | 2 | 58  | 8.60E-05 | 0.76 | R | F2 |
| FBgn0020254 | R.LVAAATHSLVEAAQNLVR.G              | 953.04  | 2 | 70  | 2.50E-06 | 0.82 | R | F2 |

|             |                                           |         |   |    |          |      |   |    |
|-------------|-------------------------------------------|---------|---|----|----------|------|---|----|
| FBgn0020254 | K.NVGIALSQLLSSVLHNQR.S                    | 997.57  | 2 | 96 | 6.00E-09 | 0.40 | R | F3 |
| FBgn0020367 | K.VGSHITGGDLYGLVHENTLVK.H                 | 1147.1  | 2 | 67 | 9.30E-06 | 0.66 | R | F2 |
| FBgn0020367 | K.ADFEQLHEDLQQAFR.N                       | 944.95  | 2 | 93 | 2.40E-08 | 0.82 | R | F3 |
| FBgn0020368 | R.VGSHITGGDLYGVVHENTLVK.Q                 | 1140.1  | 2 | 75 | 1.80E-06 | 0.94 | R | F2 |
| FBgn0020415 | K.VLLSVGGDDHDIDPDHPNK.Y                   | 1006.5  | 2 | 53 | 0.00029  | 1.20 | R | F2 |
| FBgn0020415 | K.LFTGDFIVDPHAALHK.E                      | 932.99  | 2 | 54 | 0.00028  | 1.12 | R | F2 |
| FBgn0020439 | K.IAAEEALLAEAAAQK.A                       | 794.94  | 2 | 36 | 0.0073   | 0.49 | R | F1 |
| FBgn0020618 | R.FSPNHSNPIIVSCGWDR.T                     | 1014.48 | 2 | 28 | 0.05     | 1.82 | R | F3 |
| FBgn0020618 | R.LYGSHSFISDVVLLSSDGNYSALSGSWDQTLR.L      | 1123.87 | 3 | 86 | 5.20E-08 | 0.67 | R | F6 |
| FBgn0022160 | R.NHIVHVSPSNLITIAGGK.W                    | 971.03  | 2 | 71 | 3.70E-06 | 1.31 | R | F3 |
| FBgn0022959 | R.GLGGGDGSAEPGVHDQNPGLQR.G                | 1145.03 | 2 | 69 | 3.50E-06 | 0.94 | R | F2 |
| FBgn0023023 | R.LLAEGINGPEGHELRSPEEVEAEAVHR.A           | 994.16  | 3 | 78 | 6.80E-07 | 0.90 | R | F5 |
| FBgn0023143 | R.QFLFRPHDVQPK.S                          | 888     | 2 | 33 | 0.023    | 0.74 | R | F3 |
| FBgn0023143 | R.TVSHGTPLTEEFLR.K                        | 814.92  | 2 | 36 | 0.02     | 1.02 | R | F3 |
| FBgn0023143 | K.NFPNAIEHTLQWAR.D                        | 869.94  | 2 | 47 | 0.0011   | 0.47 | R | F3 |
| FBgn0023143 | K.AHNGALPRPWNEEDANSFLEVVR.A               | 888.44  | 3 | 52 | 0.00028  | 0.65 | R | F5 |
| FBgn0023143 | K.FAHENGIALIIAETR.G                       | 848.95  | 2 | 55 | 0.00021  | 1.19 | R | F3 |
| FBgn0023213 | K.NVIDHIEHLLK.E                           | 707.89  | 2 | 53 | 0.00036  | 0.84 | R | F3 |
| FBgn0023213 | R.HQQQNNVGGNVSGGAGHSNGNNDENTWHVQTSK.G     | 1188.2  | 3 | 53 | 3.80E-05 | 0.68 | R | F4 |
| FBgn0024733 | K.YRPEHGPIAAWEK.A                         | 819.41  | 2 | 51 | 0.00046  | 0.91 | R | F3 |
| FBgn0024733 | K.ATVEDFPLCVHLVSDEYEQLSSEALEAGR.I         | 1653.79 | 2 | 65 | 1.00E-05 | 0.94 | R | F2 |
| FBgn0024923 | K.KNVFIIGATNRPDIIDPAILRPGR.L              | 910.86  | 3 | 28 | 0.015    | 0.88 | R | F4 |
| FBgn0024923 | K.NVFIIGATNRPDIIDPAILRPGR.L               | 854.16  | 3 | 47 | 0.0002   | 0.56 | R | F4 |
| FBgn0024923 | K.LHDDVDLEQIAAESHGHVGDALASLCSEALQQIR.E    | 1270.95 | 3 | 99 | 3.60E-09 | 1.27 | R | F5 |
| FBgn0024957 | R.TVHIPSQEELDIFDAAER.Y                    | 1056.53 | 2 | 71 | 4.50E-06 | 1.04 | R | F2 |
| FBgn0024957 | K.INPICPADLVIDHSVQVDFAR.A                 | 1211.13 | 2 | 75 | 2.00E-06 | 0.94 | R | F2 |
| FBgn0025704 | K.SESEGNHLPQSSSSGAAETGHKK.E               | 817.71  | 3 | 44 | 0.00082  | 1.55 | R | F2 |
| FBgn0025704 | R.GHPPEYTDGMNLGEER.F                      | 938.4   | 2 | 62 | 3.60E-06 | 0.83 | R | F3 |
| FBgn0025725 | R.TVAFHHEYPWILSASDDQTIR.I                 | 843.42  | 3 | 26 | 0.13     | 0.72 | R | F5 |
| FBgn0025725 | R.LLELAPRPDVAQQVR.K                       | 875.51  | 2 | 35 | 0.0097   | 1.00 | R | F3 |
| FBgn0026077 | R.KSELLAGLNSEGR.T                         | 729.39  | 2 | 50 | 0.00073  | 1.49 | R | F1 |
| FBgn0026077 | K.YLTENC DYLNVD CGDR.T                    | 1093.45 | 2 | 75 | 5.80E-08 | 1.43 | R | F3 |
| FBgn0026210 | K.HLDYLVHCTNEPNVSIPHLANLLIER.S            | 1037.21 | 3 | 29 | 0.049    | 1.32 | R | F5 |
| FBgn0026210 | K.APSSLLDALEQHLATLEGR.K                   | 1032.05 | 2 | 78 | 1.00E-06 | 1.17 | R | F2 |
| FBgn0026418 | R.KFNDPHVQHELTSIPAR.V                     | 693.7   | 3 | 40 | 0.0075   | 1.23 | R | F5 |
| FBgn0026418 | K.FNDPHVQHELTSIPAR.V                      | 951.98  | 2 | 43 | 0.0037   | 0.88 | R | F5 |
| FBgn0026418 | K.ALLDAAQIAGLNVLRL                        | 790.47  | 2 | 55 | 5.50E-05 | 0.76 | R | F1 |
| FBgn0026708 | K.SGQVVPGYGHAVLR.K                        | 742.91  | 2 | 37 | 0.012    | 0.81 | R | F3 |
| FBgn0026708 | R.AALPQHVVMTMLNNMPTTLHPMSQFAAAVTALNHDSK.F | 1314.32 | 3 | 54 | 0.00011  | 0.59 | R | F3 |
| FBgn0026708 | R.ALGVLASLVWDR.A                          | 671.39  | 2 | 54 | 0.00022  | 0.93 | R | F1 |
| FBgn0026777 | R.ETRPLSSDELIGELAQASLQSR.A                | 1223.15 | 2 | 33 | 0.024    | 0.81 | R | F2 |
| FBgn0026777 | R.SAAGTSAAHQSGSAAADNEDLEQPLGVSTIR.L       | 1491.72 | 2 | 82 | 1.90E-07 | 1.03 | R | F2 |

|             |                                      |         |   |    |          |      |   |    |
|-------------|--------------------------------------|---------|---|----|----------|------|---|----|
| FBgn0027088 | K.TVHVEEFIPSVVEPSFGIGR.I             | 1121.09 | 2 | 58 | 8.60E-05 | 0.70 | R | F2 |
| FBgn0027552 | K.IKPIHNQIECHPALNQK.K                | 1083.56 | 2 | 35 | 0.02     | 1.72 | R | F2 |
| FBgn0027552 | R.HIDTAYFYENENEVGAAVQR.K             | 1186.06 | 2 | 49 | 0.00032  | 0.59 | R | F3 |
| FBgn0027571 | R.MLLELTHEAIIIDAGLNPSDLR.G           | 1182.11 | 2 | 51 | 0.00044  | 0.89 | R | F2 |
| FBgn0027571 | R.AAPQLDLGGGHYVPR.Q                  | 796.92  | 2 | 62 | 4.00E-05 | 1.61 | R | F3 |
| FBgn0027580 | K.FLHGVLDTYFIDEHPQLFK.F              | 1202.1  | 2 | 48 | 0.00086  | 0.69 | R | F2 |
| FBgn0027580 | K.SVVEYLQGSIGIPHGPFPEPLR.S           | 1197.63 | 2 | 70 | 4.50E-06 | 0.77 | R | F2 |
| FBgn0028325 | R.GTIAYDIDHIQER.K                    | 786.89  | 2 | 42 | 0.0035   | 1.00 | R | F3 |
| FBgn0028482 | K.EPEHFLIGHAETFDNYYQLR.H             | 842.07  | 3 | 48 | 0.00047  | 0.89 | R | F5 |
| FBgn0028544 | K.GIPVPVHVDRPYPVVEK.R                | 1061.58 | 2 | 35 | 0.015    | 1.31 | R | F4 |
| FBgn0028544 | K.VPVHVPVDRPVPVEVPRYPVPVAKPYPVYVEK.A | 1282.05 | 3 | 43 | 0.00021  | 1.47 | R | F3 |
| FBgn0028544 | K.AVNVQVPVHVDRPYPVYVK.V              | 1132.12 | 2 | 66 | 8.20E-06 | 1.19 | R | F2 |
| FBgn0029875 | R.RQPVEEDFSTHGFPVSR.T                | 677.33  | 3 | 34 | 0.017    | 0.78 | R | F5 |
| FBgn0029875 | R.TTTTSTRPDQPDGEVLHTSK.T             | 1131.07 | 2 | 54 | 0.0002   | 0.82 | R | F2 |
| FBgn0030086 | R.ALLSLPTAIADNAGYDSAQLVSELR.A        | 1317.2  | 2 | 75 | 6.00E-07 | 0.62 | R | F1 |
| FBgn0030106 | R.TISLYSDNPSETEPHCR.L                | 1025.97 | 2 | 41 | 0.001    | 0.82 | R | F3 |
| FBgn0030106 | K.EVPLGEHNYHVNQFDR.I                 | 998.47  | 2 | 84 | 1.40E-07 | 1.01 | R | F5 |
| FBgn0031035 | K.HPELESIPNLHVIK.A                   | 855.47  | 2 | 49 | 0.00059  | 1.14 | R | F2 |
| FBgn0031035 | R.HYYWYLTNEGIELR.S                   | 1014.47 | 2 | 76 | 8.20E-07 | 0.40 | R | F3 |
| FBgn0031092 | K.VYQDSISSLEHC PKPVITAVHK.A          | 1317.67 | 2 | 48 | 0.00086  | 1.70 | R | F2 |
| FBgn0031092 | R.KFEAAEAHSSGLVSR.L                  | 836.92  | 2 | 73 | 3.40E-06 | 1.00 | R | F3 |
| FBgn0031438 | K.AETLLNESDHIAVR.R                   | 805.42  | 2 | 42 | 0.0045   | 0.78 | R | F3 |
| FBgn0031438 | R.RPLVLQLIYSPLDDR.E                  | 922.03  | 2 | 45 | 0.00096  | 0.62 | R | F3 |
| FBgn0031589 | K.QTLPEGIEHEFFEYLGNLTR.D             | 1255.13 | 2 | 31 | 0.04     | 0.91 | R | F2 |
| FBgn0031589 | K.QTGILEDLLEHAVR.H                   | 819.95  | 2 | 85 | 2.00E-07 | 1.31 | R | F3 |
| FBgn0032350 | K.VVATPHLGASTSEAQVR.V                | 882.97  | 2 | 53 | 0.00032  | 1.04 | R | F2 |
| FBgn0032350 | K.MTLEEIWPLADYITVHTPLIPATR.N         | 1411.76 | 2 | 92 | 2.50E-08 | 1.33 | R | F2 |
| FBgn0032453 | K.GEVLSAYVVGSGPPDGLHR.Y              | 1026.02 | 2 | 72 | 6.00E-06 | 0.74 | R | F3 |
| FBgn0032453 | R.EWHHWLVGNIPGGDVAK.G                | 1003.02 | 2 | 72 | 3.80E-06 | 0.49 | R | F3 |
| FBgn0032721 | K.SLADVVAHEIAHSWTGNLVTK.N            | 1226.66 | 2 | 33 | 0.027    | 0.34 | R | F2 |
| FBgn0032721 | K.RLDEILEFANSNFR.M                   | 883.46  | 2 | 36 | 0.016    | 0.73 | R | F3 |
| FBgn0032729 | K.EGTDYPVTIHGAKPGQTVR.T              | 1055.54 | 2 | 52 | 0.0004   | 1.21 | R | F2 |
| FBgn0033109 | R.TLTEPVVDLVFHQR.R                   | 848.46  | 2 | 81 | 5.00E-07 | 0.83 | R | F3 |
| FBgn0033434 | R.MNAFLEHGIPANLVATHIVNASR.E          | 840.78  | 3 | 57 | 0.00014  | 1.02 | R | F4 |
| FBgn0033465 | K.DDRIPVDHNLALYEGPEQR.F              | 760.38  | 3 | 34 | 0.021    | 0.75 | R | F5 |
| FBgn0033465 | K.HGPQDHESLKPASSCPPVYKPDGK.I         | 1505.23 | 2 | 47 | 0.00081  | 1.49 | R | F2 |
| FBgn0033465 | R.IPVDHNLALYEGPEQR.F                 | 946.99  | 2 | 57 | 0.00012  | 1.09 | R | F2 |
| FBgn0033484 | R.ERDEQFDGSAPSAFR.E                  | 878.91  | 2 | 43 | 0.00087  | 1.05 | R | F3 |
| FBgn0033484 | R.EIQPLNAEPAHNELTEQFLR.E             | 1197.62 | 2 | 75 | 1.70E-06 | 0.79 | R | F2 |
| FBgn0033504 | K.YRPQNSDELELLEGDVVHVLEK.C           | 1333.67 | 2 | 30 | 0.052    | 0.88 | R | F2 |
| FBgn0033504 | K.TDALHVDTSSSEPLAYR.A                | 910.45  | 2 | 51 | 0.00037  | 0.60 | R | F2 |
| FBgn0033728 | K.ALDYLLSLPPAK.R                     | 692.89  | 2 | 40 | 0.0073   | 1.16 | R | F1 |



|             |                              |         |   |    |          |      |   |    |
|-------------|------------------------------|---------|---|----|----------|------|---|----|
| FBgn0033886 | K.TLIVHLPESDVDDDRK.Q         | 1033    | 2 | 31 | 0.037    | 1.01 | R | F2 |
| FBgn0033886 | R.INELNPPSAHQ.R.G            | 822.92  | 2 | 51 | 0.00066  | 1.10 | R | F3 |
| FBgn0034079 | R.VAADFLHTQLNR.N             | 713.88  | 2 | 59 | 8.60E-05 | 1.17 | R | F3 |
| FBgn0034229 | K.VPLLSNVQDFGDFLSQSGK.T      | 1071.05 | 2 | 30 | 0.033    | 1.01 | R | F1 |
| FBgn0034433 | R.TEYDLHFQNLAE.R.A           | 840.91  | 2 | 45 | 0.0011   | 0.96 | R | F3 |
| FBgn0034433 | K.LLLDGISTSQASHLR.H          | 826.95  | 2 | 59 | 6.60E-05 | 1.05 | R | F3 |
| FBgn0034488 | K.ALAPPLA.YPPHDDVIR.A        | 1046.55 | 2 | 31 | 0.042    | 1.18 | R | F4 |
| FBgn0034488 | K.AANQLTDRPTIINV.AISPSSDR.K  | 1191.13 | 2 | 39 | 0.0071   | 0.92 | R | F2 |
| FBgn0034618 | K.ETESHIPISQDAEHILYR.L       | 1227.08 | 2 | 47 | 0.00081  | 0.99 | R | F4 |
| FBgn0034718 | K.EAPETGEPAAHEYY.PITPR.Y     | 1085.52 | 2 | 87 | 8.40E-08 | 0.82 | R | F2 |
| FBgn0034968 | K.HPHDVIDELNEGSIEVPAE.-      | 1071.51 | 2 | 29 | 0.047    | 0.86 | R | F3 |
| FBgn0034968 | K.HSGNIGFEDILAIAR.V          | 827.93  | 2 | 94 | 2.20E-08 | 0.96 | R | F3 |
| FBgn0035060 | K.LTNHLQATQLQISSVR.S         | 926.01  | 2 | 71 | 3.70E-06 | 0.80 | R | F3 |
| FBgn0035121 | R.RPGAGGDETKDEPWAWESR.E      | 1114.5  | 2 | 29 | 0.02     | 0.79 | R | F3 |
| FBgn0035121 | R.EGRPTAEQQLIELEDQAR.A       | 1113.56 | 2 | 45 | 0.0021   | 0.77 | R | F3 |
| FBgn0035121 | K.WSHENPAHLVDIYGGNPVK.A      | 1109.04 | 2 | 60 | 6.30E-05 | 0.94 | R | F3 |
| FBgn0035147 | R.RPSLSVYGSDFPTHDTGTGVR.D    | 1097.04 | 2 | 47 | 0.00087  | 0.57 | R | F5 |
| FBgn0035147 | R.DYIHIVDLAEGHVK.A           | 846.94  | 2 | 51 | 0.00046  | 1.31 | R | F2 |
| FBgn0035281 | R.TVEYTADDHNGFN.VVHK.T       | 1050.99 | 2 | 66 | 8.00E-06 | 1.00 | R | F2 |
| FBgn0035281 | K.YHYNYGVADSHTGDVK.S         | 955.42  | 2 | 90 | 1.30E-08 | 0.91 | R | F3 |
| FBgn0035404 | K.DHHQAQFTNLVDIAGVDVPCR.K    | 1217.59 | 2 | 41 | 0.0032   | 0.69 | R | F5 |
| FBgn0035404 | R.ILTDYGFEGHPQR.R            | 787.88  | 2 | 48 | 0.00074  | 0.92 | R | F3 |
| FBgn0035510 | K.VLAPAPLLHASPLVAK.V         | 844.03  | 2 | 30 | 0.0022   | 0.20 | R | F1 |
| FBgn0035510 | R.IVEYTADPVHGFNAVVR.R        | 965     | 2 | 59 | 8.70E-05 | 0.73 | R | F2 |
| FBgn0035600 | K.GGEDYIFSLTGYHDAPAGVVL.R.E  | 1246.64 | 2 | 58 | 7.10E-05 | 0.64 | R | F2 |
| FBgn0035600 | R.KGGEDYIFSLTGYHDAPAGVVL.R.E | 1331.69 | 2 | 63 | 3.00E-05 | 1.27 | R | F2 |
| FBgn0035600 | K.GLFDALDHQSVR.R             | 700.35  | 2 | 73 | 2.70E-06 | 1.91 | R | F3 |
| FBgn0035943 | K.SMPSPHPVVGSGFTHLTQTFWR.K   | 1284.64 | 2 | 76 | 1.30E-06 | 0.58 | R | F4 |
| FBgn0036030 | K.VYAILTHGIFSGPAISR.I        | 922.51  | 2 | 68 | 7.60E-06 | 0.38 | R | F2 |
| FBgn0036619 | K.YSVTTPTELR.T               | 606.32  | 2 | 39 | 0.0059   | 1.01 | R | F1 |
| FBgn0036619 | R.LNHLNALR.E                 | 496.79  | 2 | 41 | 0.0025   | 0.89 | R | F4 |
| FBgn0036619 | K.APLVTDTEEVQQR.L            | 848.43  | 2 | 53 | 0.00033  | 0.71 | R | F1 |
| FBgn0036642 | R.AVVAVAGQGAAASNHK.E         | 767.9   | 2 | 66 | 1.60E-05 | 0.96 | R | F1 |
| FBgn0036642 | R.NESYDIQGASHLLR.L           | 822.9   | 2 | 72 | 3.20E-06 | 1.12 | R | F3 |
| FBgn0036663 | K.NIECAIIDHAFEQGWIKPEIPEVR.T | 983.5   | 3 | 26 | 0.13     | 1.34 | R | F2 |
| FBgn0036663 | K.WNDLVFHGEWQEALR.Q          | 971.47  | 2 | 33 | 0.02     | 1.20 | R | F3 |
| FBgn0036663 | R.HGGEAHINEPSSIGSLQEAAV.NK.N | 1215.08 | 2 | 77 | 8.20E-07 | 0.93 | R | F3 |
| FBgn0036680 | R.IGPGTHNNPSVADFR.L          | 813.91  | 2 | 51 | 0.00042  | 1.51 | R | F3 |
| FBgn0036680 | R.AHVQNIIDIPLGGR.I           | 774.44  | 2 | 56 | 0.00012  | 0.87 | R | F3 |
| FBgn0036927 | K.FWAHEHFELESPPDVVTF.SK.K    | 1246.6  | 2 | 31 | 0.029    | 1.57 | R | F3 |
| FBgn0036927 | K.LQLGGYFHNDDFIPNEPYR.I      | 1169.05 | 2 | 73 | 2.00E-06 | 0.93 | R | F2 |
| FBgn0037001 | K.LNSFICPGTPIGGLH.PAR.I      | 975.01  | 2 | 44 | 0.0023   | 1.01 | R | F3 |

|             |                                                  |         |   |     |          |      |   |    |
|-------------|--------------------------------------------------|---------|---|-----|----------|------|---|----|
| FBgn0037001 | R.YQLSELVDWFHR.L                                 | 817.91  | 2 | 73  | 3.10E-06 | 0.88 | R | F3 |
| FBgn0037138 | K.NFHFIHASADVSVVTSTIR.S                          | 1136.57 | 2 | 51  | 0.00049  | 0.73 | R | F5 |
| FBgn0037138 | R.EAGVPDGVVNFVPADGPVFGDTITASPHLAGINFTGSPVPTFNR.L | 1461.4  | 3 | 60  | 2.10E-05 | 0.63 | R | F2 |
| FBgn0037146 | R.ASAVNTLADLLVSR.E                               | 737.92  | 2 | 42  | 0.0015   | 1.41 | R | F1 |
| FBgn0037146 | K.WILEGQDHAAADFAEGGGR.T                          | 1021.48 | 2 | 63  | 1.50E-05 | 0.84 | R | F3 |
| FBgn0037146 | R.EEISDLLSMENHIDLIIPR.G                          | 1140.09 | 2 | 75  | 2.00E-06 | 0.56 | R | F2 |
| FBgn0037146 | R.LASIVEQV AECHLEGR.E                            | 926.97  | 2 | 84  | 2.10E-07 | 1.51 | R | F3 |
| FBgn0037146 | K.EALATVGAEHAVSLVSTR.E                           | 927     | 2 | 98  | 9.80E-09 | 1.19 | R | F2 |
| FBgn0037525 | R.RAPAPNPSQFVGATNEPPLPR.R                        | 1129.6  | 2 | 33  | 0.023    | 0.89 | R | F2 |
| FBgn0037525 | R.KQAATLHELEPLVSDTDDR.K                          | 1111.56 | 2 | 56  | 0.00013  | 0.56 | R | F2 |
| FBgn0037580 | K.AFEVQVGLHELLGHGSGK.L                           | 981.51  | 2 | 47  | 0.0012   | 0.82 | R | F2 |
| FBgn0037580 | K.TYEPTHEGYIQSWVER.Y                             | 1018.97 | 2 | 57  | 8.20E-05 | 0.85 | R | F3 |
| FBgn0037607 | R.TSRPNTCVIYDNEEPFTIGR.G                         | 1206.06 | 2 | 37  | 0.0062   | 0.68 | R | F2 |
| FBgn0037607 | R.VVVVEDHYQQGGLGEAVLSALAGER.N                    | 1319.69 | 2 | 76  | 1.10E-06 | 0.58 | R | F2 |
| FBgn0038049 | R.ALDLILTGRPVGSQEAHDIGLVNR.I                     | 862.81  | 3 | 60  | 2.10E-05 | 0.59 | R | F4 |
| FBgn0038110 | R.ATHAGSWYTDSGAELSR.Q                            | 925.92  | 2 | 38  | 0.0037   | 0.83 | R | F3 |
| FBgn0038145 | R.VQQAIPGIMQHIEQVCR.K                            | 1025.03 | 2 | 50  | 0.00064  | 1.28 | R | F3 |
| FBgn0038145 | K.DVVHQMSVQLEELYNGATR.K                          | 1116.04 | 2 | 56  | 0.00016  | 0.61 | R | F2 |
| FBgn0038271 | R.IPLHELEQR.I                                    | 590.34  | 2 | 35  | 0.019    | 0.77 | R | F3 |
| FBgn0038271 | K.NNGVAHFLEHMAFK.G                               | 849.91  | 2 | 41  | 0.003    | 1.26 | R | F3 |
| FBgn0038293 | K.MVFHPEFLTSTNPLFGIDYEEFVR.G                     | 1467.21 | 2 | 43  | 0.0019   | 0.82 | R | F2 |
| FBgn0038293 | K.FSAIHEFQNLHAVAK.E                              | 898.46  | 2 | 56  | 0.00018  | 0.79 | R | F3 |
| FBgn0038405 | R.FGLERPTPTAAAPPPQQPQR.V                         | 1213.64 | 2 | 44  | 0.0022   | 0.78 | R | F2 |
| FBgn0038405 | R.LSIPGAVASPGQVPHR.Q                             | 815.96  | 2 | 61  | 5.20E-05 | 1.02 | R | F3 |
| FBgn0038587 | R.LFGVSTLDVVR.A                                  | 624.35  | 2 | 44  | 0.002    | 0.94 | R | F1 |
| FBgn0038587 | K.QNPLVTDLALYDIVHTPGVAADLSHIDTK.S                | 1600.84 | 2 | 88  | 4.40E-08 | 0.76 | R | F2 |
| FBgn0038839 | K.HCYIEQAFDNLHDHGYR.M                            | 739.66  | 3 | 35  | 0.0033   | 1.54 | R | F6 |
| FBgn0039358 | R.NYGDHYAIFEPGTR.N                               | 841.39  | 2 | 46  | 0.00059  | 1.08 | R | F3 |
| FBgn0039358 | K.NIANPVAMISASIDMLNHLGHK.E                       | 1215.63 | 2 | 85  | 1.50E-07 | 1.02 | R | F2 |
| FBgn0039358 | K.EHANVIQEAVYQTIVNDAIR.T                         | 1163.11 | 2 | 120 | 5.20E-11 | 0.68 | R | F2 |
| FBgn0039359 | K.THDDGTPEKPFGRHALVAGIDRYPR.K                    | 913.8   | 3 | 29  | 0.066    | 0.59 | R | F6 |
| FBgn0039359 | K.THDDGTPEKPFGRHALVAGIDR.Y                       | 1159.07 | 2 | 64  | 1.80E-05 | 0.68 | R | F4 |
| FBgn0039480 | R.TTDVLYSPLQRPARPEPDYSQTQSGDGPNSVR.I             | 1241.94 | 3 | 33  | 0.016    | 0.40 | R | F4 |
| FBgn0039480 | R.ISRPVYALPPASPAPSSAR.A                          | 991.55  | 2 | 42  | 0.0027   | 0.62 | R | F2 |
| FBgn0039480 | R.VQYAPAPQPQPPLPQPQLPQQHHQPSVGPAPPR.L            | 1298.35 | 3 | 55  | 7.40E-05 | 0.77 | R | F5 |
| FBgn0039562 | K.ALHIMDSGIGMTHQDLINNLGTIAK.S                    | 918.48  | 3 | 26  | 0.12     | 0.99 | R | F2 |
| FBgn0039737 | R.AHVHYVVTEHGIASLFGK.N                           | 1025.04 | 2 | 63  | 3.20E-05 | 0.65 | R | F5 |
| FBgn0039737 | K.QIVKPDVSVFIHVSPPDNHGYCSLGTSVDCVR.A             | 1189.91 | 3 | 65  | 1.10E-05 | 1.14 | R | F4 |
| FBgn0039737 | K.DGATLQMGIGSIPDAVLAALHNHK.D                     | 1257.15 | 2 | 78  | 9.40E-07 | 0.97 | R | F2 |
| FBgn0040064 | R.ITGHLVHELQR.K                                  | 672.87  | 2 | 45  | 0.002    | 1.54 | R | F5 |
| FBgn0040064 | K.EVDFVVDEHPRPK.T                                | 825.91  | 2 | 63  | 3.20E-05 | 1.18 | R | F3 |
| FBgn0040064 | K.LNVNGGAIALGHPLGASGR.I                          | 952.02  | 2 | 75  | 1.50E-06 | 1.02 | R | F3 |

|             |                                     |         |   |    |          |      |   |    |
|-------------|-------------------------------------|---------|---|----|----------|------|---|----|
| FBgn0040660 | R.HKEFLENLHK.-                      | 710.87  | 2 | 46 | 0.0017   | 0.62 | R | F3 |
| FBgn0041789 | K.TWHPEHFTCNHCSQELGTR.N             | 814.69  | 3 | 25 | 0.017    | 0.96 | R | F6 |
| FBgn0041789 | K.TWTEHFFCAQCQQFGGEGFHER.D          | 1024.09 | 3 | 31 | 0.00067  | 0.40 | R | F6 |
| FBgn0041789 | R.SPTAGHDFNGSSTTPGYANQGS LPR.Q      | 1282.6  | 2 | 65 | 7.70E-06 | 0.82 | R | F2 |
| FBgn0041789 | R.AIMENYISALNSQWHPDC FVCR.D         | 919.43  | 3 | 70 | 1.50E-06 | 0.46 | R | F2 |
| FBgn0041789 | R.DGFPYCEPDYHNLFS PR.C              | 1078.46 | 2 | 74 | 3.10E-07 | 0.87 | R | F3 |
| FBgn0050084 | R.GGSTWRPHVTP TGNVPQNSPYLQTVTK.T    | 1552.29 | 2 | 37 | 0.0081   | 0.84 | R | F2 |
| FBgn0050084 | R.HVSAPVNSPKPPSTGGLPTGQNICTECER.L   | 1587.76 | 2 | 67 | 6.10E-06 | 0.91 | R | F2 |
| FBgn0050122 | K.VGLSWLSD LHLR.I                   | 776.91  | 2 | 44 | 0.0022   | 0.93 | R | F3 |
| FBgn0051878 | R.IVDYTADPLLGFNAQVR.R               | 967.51  | 2 | 64 | 2.60E-05 | 1.09 | R | F1 |
| FBgn0052029 | R.DYQQYQPQQAAYRPPAQAAPQPPR.R        | 938.8   | 3 | 55 | 0.00014  | 0.27 | R | F2 |
| FBgn0052311 | R.AVHVQVQQWLEALHDR.R                | 625.66  | 3 | 39 | 0.0073   | 0.80 | R | F5 |
| FBgn0052311 | R.GSGLPASSDVQTVS QEHNTSSR.V         | 1208.04 | 2 | 92 | 1.10E-08 | 0.89 | R | F3 |
| FBgn0053113 | R.LHPQVESLIYWR.D                    | 791.92  | 2 | 56 | 0.00015  | 0.84 | R | F3 |
| FBgn0053113 | K.QSIDTHL DLVR.S                    | 669.86  | 2 | 75 | 1.90E-06 | 1.05 | R | F3 |
| FBgn0053113 | K.VQNIAGVAVAHINGFISELR.R            | 1075.6  | 2 | 93 | 1.60E-08 | 0.83 | R | F2 |
| FBgn0053138 | K.LFETDGYLRPFEHEIR.R                | 688.68  | 3 | 26 | 0.17     | 0.92 | R | F5 |
| FBgn0053138 | K.HYGLHFQPDNSVIAR.E                 | 898.45  | 2 | 43 | 0.0033   | 1.29 | R | F5 |
| FBgn0053138 | R.LITHALGGEAYLNFMGNEFGHPEWLD FPR.V  | 1125.21 | 3 | 48 | 0.00052  | 1.16 | R | F4 |
| FBgn0053715 | R.RPAVLNTPHIDKLEK.E                 | 933.55  | 2 | 28 | 0.037    | 0.85 | R | F3 |
| FBgn0053715 | R.LQNSQH GIDYEHLVQDLDEHK.I          | 1304.64 | 2 | 32 | 0.026    | 0.75 | R | F4 |
| FBgn0053715 | R.VETSLHVIHALLQEHADK.K              | 710.72  | 3 | 41 | 0.0041   | 0.66 | R | F5 |
| FBgn0053715 | K.QAQGELLVEHLVHTGEVV LASTSAQGQEIR.N | 1118.94 | 3 | 42 | 0.0011   | 0.81 | R | F4 |
| FBgn0053715 | K.FHALEHNFGQALQENR.A                | 976.97  | 2 | 67 | 8.90E-06 | 0.48 | R | F5 |
| FBgn0053715 | K.EIHQWLSEAEQLLGTHNLSGGR.D          | 1259.12 | 2 | 70 | 4.90E-06 | 0.61 | R | F5 |

<sup>a</sup>FlyBase IDs were obtained from the FlyBase database ([www.flybase.org](http://www.flybase.org)).

<sup>b</sup>Peptides are tryptic peptides with the primary amino groups (i.e., amino-termini and lysine residues) acetylated.

<sup>c</sup>Descriptive titles were obtained directly from Mascot ([www.matrixscience.com](http://www.matrixscience.com)) results.

<sup>d</sup>Ratios were computed using peak intensities from extracted ion chromatograms of light- and heavy-labeled peptides.

<sup>e</sup>F indicates that the peptide was obtained from the forward labeling experiment and R indicates that it was obtained from the reverse labeling experiment.

<sup>f</sup>The SCX fraction number from which the corresponding peptide was identified.
